# Determinants of SARS-CoV-2 transmission to guide vaccination strategy in an urban area

Sarah C. Brüningk<sup>1,2,\*</sup>, Juliane Klatt<sup>1,2,\*</sup>, Madlen Stange<sup>2,3,5,\*</sup>, Alfredo Mari<sup>2,3,5</sup>, Myrta Brunner<sup>3,4</sup>,  
Tim-Christoph Roloff<sup>2,3,5</sup>, Helena M.B. Seth-Smith<sup>2,3,5</sup>, Michael Schweitzer<sup>3,5</sup>, Karoline Leuzinger<sup>6,15</sup>,  
Kirstine K. Sogaard<sup>3,5</sup>, Diana Albertos Torres<sup>3,5</sup>, Alexander Gensch<sup>3</sup>, Ann-Kathrin Schlotterbeck<sup>3</sup>,  
Christian H. Nickel<sup>7</sup>, Nicole Ritz<sup>9</sup>, Ulrich Heininger<sup>9</sup>, Julia Bielicki<sup>9</sup>, Katharina Rentsch<sup>10</sup>, Si-  
mon Fuchs<sup>12</sup>, Roland Bingisser<sup>7</sup>, Martin Siegemund<sup>11</sup>, Hans Pargger<sup>11</sup>, Diana Ciardo<sup>13</sup>, Olivier  
Dubuis<sup>13</sup>, Andreas Buser<sup>14</sup>, Sarah Tschudin-Sutter<sup>8</sup>, Manuel Battegay<sup>8</sup>, Rita Schneider-Sliwa<sup>4</sup>,  
Karsten M. Borgwardt<sup>1,2,+</sup>, Hans H. Hirsch<sup>6,8,15,+</sup>, Adrian Egli<sup>3,5,+†</sup>

<sup>1</sup>*Machine Learning & Computational Biology, Department of Biosystems Science and Engineer-  
ing, ETH Zurich, Basel, Switzerland*

<sup>2</sup>*Swiss Institute for Bioinformatics (SIB), Lausanne, Switzerland*

<sup>3</sup>*Applied Microbiology Research, Department of Biomedicine, University of Basel, Basel,  
Switzerland*

<sup>4</sup>*Human Geography, Department of Environmental Sciences, University of Basel, Basel,  
Switzerland*

<sup>5</sup>*Clinical Bacteriology and Mycology, University Hospital Basel & University of Basel, Basel,  
Switzerland*

<sup>6</sup>*Clinical Virology, University Hospital Basel & University of Basel, Basel, Switzerland*

<sup>7</sup>*Emergency Department, University Hospital Basel, Basel, Switzerland*

<sup>8</sup>*Infectious Diseases and Hospital Epidemiology, University Hospital Basel & University of Basel,*

22 *Basel, Switzerland*

23 <sup>9</sup>*Paediatric Infectious Diseases and Vaccinology, University of Basel Children's Hospital Basel*  
24 *and University of Basel, Basel, Switzerland*

25 <sup>10</sup>*Laboratory Medicine, University Hospital Basel, Basel, Switzerland*

26 <sup>11</sup>*Intensive Care Medicine, University Hospital Basel, Basel, Switzerland*

27 <sup>12</sup>*Health Services for the Basel-City, Basel, Switzerland*

28 <sup>13</sup>*Viollier AG, Allschwil, Switzerland*

29 <sup>14</sup>*Regional Blood Transfusion Service, Swiss Red Cross, Basel, Switzerland*

30 <sup>15</sup>*Transplantation & Clinical Virology, Department Biomedicine, University of Basel, Basel,*  
31 *Switzerland*

32 *\*These authors contributed equally to this work*

33 *+These authors share senior authorship*

34 *†corresponding author*

35 **Background.** Transmission chains within small urban areas (accommodating~30% of the  
36 European population) greatly contribute to case burden and economic impact during the  
37 ongoing COVID-19 pandemic, and should be a focus for preventive measures to achieve con-  
38 tainment. Here, at very high spatio-temporal resolution, we analysed determinants of SARS-  
39 CoV-2 transmission in a European urban area, Basel-City (Switzerland). Methodology. We  
40 combined detailed epidemiological, intra-city mobility, and socioeconomic data-sets with  
41 whole-genome-sequencing during the first SARS-CoV-2 wave. For this, we succeeded in se-  
42 quencing 44% of all reported cases from Basel-City and performed phylogenetic clustering

43 **and compartmental modelling based on the dominating viral variant (B.1-C15324T; 60% of**  
44 **cases) to identify drivers and patterns of transmission. Based on these results we simulated**  
45 **vaccination scenarios and corresponding healthcare-system burden (intensive-care-unit oc-**  
46 **cupancy). Principal Findings. Transmissions were driven by socioeconomically weaker and**  
47 **highly mobile population groups with mostly cryptic transmissions, whereas amongst more**  
48 **senior population transmission was clustered. Simulated vaccination scenarios assuming**  
49 **60-90% transmission reduction, and 70-90% reduction of severe cases showed that prioritiz-**  
50 **ing mobile, socioeconomically weaker populations for vaccination would effectively reduce**  
51 **case numbers. However, long-term intensive-care-unit occupation would also be effectively**  
52 **reduced if senior population groups were prioritized, provided there were no changes in test-**  
53 **ing and prevention strategies. Conclusions. Reducing SARS-CoV-2 transmission through**  
54 **vaccination strongly depends on the efficacy of the deployed vaccine. A combined strategy of**  
55 **protecting risk groups by extensive testing coupled with vaccination of the drivers of trans-**  
56 **mission (i.e. highly mobile groups) would be most effective at reducing the spread of SARS-**  
57 **CoV-2 within an urban area.**

## 58 **Author summary**

59 We examined SARS-CoV-2 transmission patterns within a European city (Basel, Switzerland)  
60 to infer drivers of the transmission during the first wave in spring 2020. The combination of  
61 diverse data (serological, genomic, transportation, socioeconomic) allowed us to combine phy-  
62 logenetic analysis with mathematical modelling on related cases that were mapped to a resi-

63 dental address. As a result we could evaluate population groups driving SARS-CoV-2 transmis-  
64 sion and quantify their effect on the transmission dynamics. We found traceable transmission  
65 chains in wealthier or more senior population groups and cryptic transmissions in the mo-  
66 bile, young or socioeconomic weaker population groups - these were identified as transmission  
67 drivers of the first wave. Based on this insight, we simulated vaccination scenarios for vari-  
68 ous vaccine efficacies to reflect different approaches undertaken to handle the epidemic. We  
69 conclude that vaccination of the mobile inherently younger population group would be most  
70 effective to handle following waves.

71

## 72 **Introduction**

73 Efforts to understand transmission of SARS-CoV-2 have been undertaken at different scales in-  
74 cluding at a global level<sup>1-3</sup>, across continents (Europe and North America<sup>4</sup>), within countries  
75 (Austria<sup>5</sup>, Brazil<sup>6</sup>, France<sup>7</sup>, Iceland<sup>8</sup>, South Africa<sup>9</sup>, Thailand<sup>10</sup>) and in large cities (Beijing<sup>11</sup>,  
76 Boston<sup>12</sup>, Houston<sup>13</sup>, and New York City<sup>14-16</sup>). In Europe, ~30% of the population live in small  
77 urban areas (10k – 300k inhabitants)<sup>17</sup>, which accordingly play a major role in SARS-CoV-2  
78 transmission yet have not been studied. Moreover, to date city-based studies of SARS-CoV-  
79 2 transmission have very limited resolution in terms of the proportion of sequenced positive  
80 cases (incomplete transmission chains), have a paucity of socioeconomic or mobility data (in-  
81 complete determinants), or fail to combine analysis of transmission clusters with quantita-  
82 tive, descriptive models accounting for population mixing<sup>18</sup>. Of those studies describing the

83 distribution of cases together with changes in mobility, none to date rigorously study socioe-  
84 conomic differences between city quarters as determinants of transmission<sup>13,15,16,19</sup>. An inte-  
85 grated model considering all of these factors (including epidemiological, geographic, mobil-  
86 ity, socioeconomic, transmission dynamics information) is anticipated to provide profound  
87 insights into the determinants underpinning transmission, that can be used to guide the de-  
88 livery of vaccines. We here present such an integrated analysis for Basel-City which is part of  
89 a metropolitan area, a functional urban area, and a European cross-border area as outlined in  
90 the supplement. Basel-City is hence representative of other areas in the EU classified as such.  
91 Local interventions are most effective in cutting transmission chains in families, and small  
92 community networks<sup>20,21</sup> that represent well-defined (phylogenetic or epidemiological) clus-  
93 ters. However, most infections are acquired from unknown sources and transmitted crypti-  
94 cally making it essential to identify the key determinants and transmission routes at the city-  
95 level to improve interventions and vaccination campaigns. To address this challenge, we have  
96 combined phylogenetic cluster analysis<sup>22</sup> and compartmental ordinary differential equation  
97 (ODE) modelling based on high density (81% of reported cases assessed), and high resolution  
98 (spatial:housing blocks, temporal: day-by-day) epidemiological, mobility, socioeconomic, and  
99 serology (estimate unreported cases) data-sets from the first COVID-19 wave (February-April  
100 2020). Whole genome sequencing (WGS) of all included cases (44% of all cases successful) al-  
101 lowed the analysis be restricted to a single, dominant viral variant (B.1-C15324T, 60% of cases  
102 <sup>23</sup>). This ensured that our analyses focused on inherently related cases and enabled estimation  
103 of effective reproductive numbers for different socioeconomic and demographic population

104 subgroups to provide the basis for vaccination scenario building.

## 105 **Results**

106 **SARS-CoV-2 spread and clustering.** We observed 29 viral lineages in Basel-City (Figure S8),  
107 with 247 genomes (60.0%) belonging to the B.1-C15324T variant<sup>23</sup> (Figure 2A, B). Applying a  
108 genetic divergence threshold, a total of 128 phylogenetic clusters were determined across all  
109 samples, of which 70 belonged to lineage B.1-C15324T (Figure 2C). Mapping phylogenetic clus-  
110 ters onto tertiles of socioeconomic and demographic determinants, we found that for median  
111 income, T1 contained the most and T3 the least clusters (Figure 2C). Most within- and among-  
112 tertile transmission clusters were spread randomly, except for significant within-tertile trans-  
113 missions among high median income households (T3) (Figure 2D). Further, we observed that  
114 SARS-CoV-2 isolates were more likely to belong to the same phylogenetic cluster for blocks with  
115 either the highest living space per person, lowest share of 1-person households, or highest se-  
116 niority (Figure 2E). This is also true among people living in the more affluent quarters Riehen,  
117 Bruderholz, Am Ring, and Iselin, who transmitted the virus in their social networks either in the  
118 same quarter or in the same socioeconomic rank (Figure S7). By contrast, positive cases that  
119 belong to lower socioeconomic/demographic tertiles (either lower income, less living space,  
120 or younger age) are less likely to be members of the same tight phylogenetic cluster, indicat-  
121 ing cryptic transmission predominates among lower socioeconomic and younger demographic  
122 groups.

123 **Spatio-temporal variation of mobility and social interaction patterns.** Figure 3A and Figures  
124 S3-S4 show Basel-City's partition and the corresponding mobility graph. Importantly, the sta-  
125 tistical blocks per tertile do not form a single, geographically connected, entity. We observe that  
126 mobility varies by transport modality and tertile (Figure 3A inset). For example, for low-median  
127 income (T1) the share of private motorized traffic and mobility is more pronounced than in the  
128 tertiles of higher median income (T2 and T3).

129 Figure 3B shows for each partition the summed edge weights of the mobility graph accounting  
130 for the mobility contribution to the final effective reproductive number. We observe that low  
131 and median income populations are more mobile than their wealthier counterparts. For living  
132 space per person or percentage of senior citizens, mobility was comparable between tertiles  
133 with a trend towards higher mobility within the younger population groups.

134 Dynamic changes in mobility were assessed by agglomerating normalized traffic counts for  
135 public and private transport modalities (Figure 3C). There was a clear drop in mobility for both  
136 public and private transport modes around the onset of the national lockdown date (12th March  
137 2020). The decrease was more pronounced for public transport, resulting in a weighted aver-  
138 age mobility drop of approximately 50% (Figure 3D). Figure 3D also shows the dynamic change  
139 in social interaction contribution to B.1-C15324T case numbers. Despite noticeable fluctua-  
140 tion, social interaction contribution decreased on average over time. This data also reflects  
141 variation in case reporting which affected the estimated effective reproductive number. Im-  
142 portantly, since the B.1-C15324T variant was eventually eradicated despite non-zero mobility,  
143 a final social interaction contribution of zero was expected.

144 **Spatio-temporal spread of the epidemic and its socioeconomic determinants.** Unreported  
145 cases appeared to be a driving force of the transmission (88% for the sequenced B.1-C15324T  
146 variant). Figures 4A-C (and Figure S5) show the SEIR-model fit to data for each median income  
147 tertile. The corresponding dynamic change of the effective reproductive number ( $R_{eff}$ ) is given  
148 in Figures 4D-F. Independent of the underlying partition, the model provided adequate fits and  
149 we observed a drop in  $R_{eff}$  following the dynamic changes in mobility and social interaction.  
150 Importantly, there was a significant difference (achieved significance level below the Bonferoni  
151 corrected significance threshold of 5%) in  $R_{eff}$  between statistical blocks of the highest and  
152 lowest median income. For all socioeconomic partitions the obtained parameter distributions  
153 are summarized as histograms with median values and 95% confidence intervals in Figures 4G-  
154 I. Here, we found that blocks with higher living space per person, or higher median income  
155 had a significantly lower  $R_{eff}$  ( $< 1.7$ ) compared to the maximum  $R_{eff}$  observed in the relevant  
156 partition. A partitioning based on the share of senior residents did not result in significant dif-  
157 ferences in  $R_{eff}$ . Differences in  $R_{eff}$  are due to two factors: the effective mobility contribution  
158 (Figure 3B), and the modelled reproductive number ( $R$ , eq.(8)). In particular, the tertile with  
159 the highest share of median income (T3) showed less mobility compared to T2 and T3, em-  
160 phasizing differences in  $R_{eff}$ . By contrast, mobility in the T1 and T3 tertiles of living space per  
161 person were more similar (Figure 3B), yet differences in  $R_{eff}$  were significant, indicating that  
162 the transmission was not dominated by mobility alone.



163 **Impact of mobility changes and modelling of vaccination scenarios.** We simulated the de-  
164 velopments of the first wave of the epidemic under the assumption of different mobility scenar-  
165 ios and modelled two future vaccination strategies. Figure 5A displays the results for mobility  
166 scenarios as observed with up to 50% mobility reduction (scenario M0), 100% mobility (sce-  
167 nario M1), and no mobility (scenario M2). Peak case numbers (April 12<sup>th</sup>) would have been  
168 approximately three times higher in the case of no reduction in mobility (M1). Mobility reduc-  
169 tion hence played a vital role for the containment of SARS-CoV-2.

170 Figure 5B shows the results for an outbreak scenario (denoted as V1) in which a specific frac-  
171 tion of the population (33% or 66%) received a vaccine that provided either 60% or 90% vac-  
172 cine transmission reduction, with 90% severe COVID-19 case prevention. As expected, we ob-  
173 serve that higher vaccine efficacy or higher population fraction vaccinated reduces the slope  
174 and plateau of the epidemic curve. Scenarios for less effective vaccines are shown in Figure S9.

175 Effectiveness to prevent severe COVID-19 solely affects the rate of severe cases and hence ICU  
176 occupancy and the time point of reaching 50% ICU occupancy (Figure 5B vs. Figure S9E). It  
177 should be noted, that vaccination of the population at random is an artificial scenario, applied  
178 here only to demonstrate the impact of vaccination efficacy relative to the population fraction  
179 vaccinated. This scenario serves as a baseline comparison for two more realistic vaccination  
180 strategies given in Figure 5C. Here, as a proof of concept, vaccines that provide 90% transmis-  
181 sion reduction, and 90% reduction of severe cases are delivered to 23% of the population are  
182 presented. For scenario V2, vaccination is prioritized in what we determined as determinants  
183 of SARS-CoV-2 transmission – individuals with low income, who have fewer options to socially

184 distance (e.g. by working from home) and hence were more likely to be exposed to and/or  
185 transmit the virus (reflected by a higher  $R_{eff}$ ). With this strategy, the slope of the epidemic  
186 curve would be reduced compared to randomly vaccinating the same number of subjects from  
187 the whole population. Figure 5D describes the corresponding development of ICU occupancy  
188 for the scenarios modelled, revealing that scenario V2 leads to a delay of approximately 11 days  
189 to reach the 50% ICU capacity mark as compared to scenario V1. In scenario V3, resembling  
190 the approach by several countries, priority was given to the population group with the high-  
191 est share of senior residents, which had lower mobility than the rest of the population (Fig-  
192 ure 3B) but constitutes 60% of ICU cases. We observe that scenario V3 resulted in a marginally  
193 steeper epidemic curve (Figure 5C) and would yield 50% ICU capacity at a similar time as a ran-  
194 dom vaccination strategy (Figure 5D). However, the total number of cases at this time would  
195 be approximately double in scenario V3 compared to V1 (Figure 5C), whereas the overall peak  
196 ICU occupancy would be lowest in V3 (Figure 5D). These simulations suggest that - in case of  
197 vaccines reducing SARS-CoV-2 transmission - vaccination of population groups driving trans-  
198 mission are most effective in reducing the slope of the epidemic curve, whereas vaccination  
199 of high-risk groups reduces healthcare system burden in the long term. The presented effects  
200 strongly depend on the specific vaccine characteristics and population fraction vaccinated. In  
201 Figure 5E, F we finally show the potential effects of a mixed vaccination scenario giving equal  
202 priority to senior and highly mobile population groups as a representative example. This mixed  
203 mode provides a possible compromise with lower case numbers compared to V1, but also de-  
204 layed and reduced ICU occupancy relative to V1.

## 205 **Discussion**

206 This analysis evaluates complementary aspects of the spread of SARS-CoV-2 within a medium-  
207 sized European urban area, including local transmission analysed by phylogenetic tree infer-  
208 ence and clustering, and the overall spread described by a compartmental SEIR-model enabling  
209 simulation of vaccination strategies. The main strength of this study lies in the high degree of  
210 diverse and detailed data included as well as the complementary models and analyses.

211 Patterns of SARS-CoV-2 transmission have previously been discussed from different angles ei-  
212 ther via network and transmission modelling<sup>24</sup>, by statistical evaluation<sup>25</sup>, or by phylogenetic  
213 clustering based on genomic sequencing data<sup>26</sup>. Independent of model choice, the importance  
214 of socioeconomic factors has been suggested previously<sup>18,24</sup>. However, analyses focused on  
215 metropolitan areas only may be biased towards their underlying socioeconomic and demo-  
216 graphic characteristics making it important to also quantify SARS-CoV-2 transmission in other  
217 urban areas, such as in a city context, as well as in countries across all continents and stages  
218 of economic potential. Modelling studies provide the foundation of scenario predictions and  
219 estimation of effective reproductive numbers but require balancing the trade-off between de-  
220 tail described and the number of data points available. Accordingly, many published models  
221 rely on publicly available case numbers without being able to directly relate socioeconomic  
222 parameters and specific geographic locations per case, and/or are only performed for large  
223 metropolitan areas<sup>19</sup>. This has led to biases in evaluations and the neglect of a considerable  
224 population share living outside major cities (53%/41% in Europe/worldwide)<sup>27,28</sup>. In this study  
225 we chose Basel-City as a case study of a European urban area. Despite the strong economic

226 status of Switzerland and an obligatory health insurance, implying potentially less extreme so-  
227 cioeconomic gradients than other countries, we demonstrate that socioeconomic background  
228 impacts the probability to acquire and transmit SARS-CoV-2. It would be expected that in  
229 cities containing more pronounced socioeconomic gradients, these disparities would empha-  
230 size transmission patterns of SARS-CoV-2 between and within socioeconomic groups.

231 The success of our analyses is based on the optimized choice of evaluation and model, high  
232 data-density and -quality, rather than large absolute case numbers. It is difficult to distinguish  
233 the spread of competing viral variants within the same population and to account for new intro-  
234 ductions in a model since classical ODE or agent-based models are relying on the assumption  
235 of uninterrupted transmission chains. Sequencing information is essential to reliably inform  
236 on such transmission patterns. Yet given the cost of such analyses, WGS covering entire epi-  
237 demic waves is often unfeasible. We included 81% of all reported cases in the study time frame  
238 and geographic area, which allowed us to restrict our analysis to a subset of 247 phylogenet-  
239 ically related cases consisting of a single SARS-CoV-2 variant. Given the ~200k inhabitants of  
240 Basel-City, this implies one of the largest per-capita sequencing densities of reported studies  
241 to date. We deliberately choose a simple way to incorporate socioeconomic, demographic and  
242 mobility information into our compartmental model since more complex network approaches  
243 would be unfeasible for limited case numbers. The use of mobility and socioeconomic data in  
244 our models is unique since we include regularly collected data analysed by the statistical office  
245 of Basel-City, providing a high spatial and temporal resolution network of the inner city mo-  
246 bility patterns. In contrast to mobile phone data<sup>16,19,24,29</sup> our data is not subjected to privacy

247 legislation and is hence expected to be more readily available for other medium-sized urban  
248 areas around the world, making our analysis transferable. We do not hold information on the  
249 duration and specific location of individuals, but a continuum estimate of population mixing  
250 that aligns well with the concept of a compartmental ODE model. Mobility and the reduction  
251 thereof have been suggested as a proxy to evaluate the reduction of the spread of SARS-CoV-2  
252 <sup>6,29,30</sup>; however, there has also been a change in hygiene practices and social interaction be-  
253 haviour. In our SEIR-model we separate these two contributions allowing for an easier transla-  
254 tion of our model for scenario building. We further addressed unreported cases which were the  
255 driving force of infection outside the observed clusters. Our 77% estimate of unreported cases  
256 overall (not limited to B.1-C15324T) falls within the range of previous reports within Europe<sup>8,31</sup>.  
257 The SEIR-model evaluates general trends of transmission, such as effective reproductive num-  
258 bers, and vaccine scenario building. To complement this, we employ phylogenetic analysis  
259 to identify transmission clusters. This comprehensive evaluation showed that socioeconomic  
260 brackets characterized by low median income and smaller living space per person, were asso-  
261 ciated with significantly larger effective reproductive numbers. In line with previous results<sup>24</sup>,  
262 we suggest that population groups from a weaker socioeconomic background are more mobile  
263 and at higher risk for SARS-CoV-2 infection/transmission originating from multiple sources via  
264 cryptic transmission. This aligns with the possibility that low socioeconomic status may relate  
265 to jobs requiring higher personal contact, and unavoidable mobility<sup>32</sup>, which has been shown to  
266 increase the risk of infection by 76%<sup>33</sup>. By contrast, phylogenetic clusters were predominantly  
267 discovered within higher socioeconomic, or more senior groups, implying a spread within the

268 same social network. It is likely that those individuals are retired, or have had the ability to work  
269 from home, a pattern that has been observed also in other cities<sup>34</sup>. Effective contact tracing and  
270 testing strategies could be most efficient for these groups, which were not driving SARS-CoV-2  
271 transmission.

272 These results should be accounted for during vaccine prioritization depending on the relevant  
273 vaccine characteristics and ICU capacity available. Our simulation framework provides flexi-  
274 bility to model various scenarios and vaccine efficacies but did not account for fatalities due to  
275 limited case numbers during the studied period in Basel-City. In case of a combined effect of  
276 vaccines to both prevent SARS-CoV-2 transmission and protect against COVID-19<sup>35-37</sup>, vaccina-  
277 tion of individuals driving transmission in addition to the protection of high-risk groups would  
278 be ideal to arrive at a combined concept of protection from and containment of SARS-CoV-2.  
279 Vaccinating high-risk groups reduces the number of hospitalized and ICU patients in the short  
280 term, the spread of the pandemic would however, be more effectively contained by vaccinating  
281 the transmission drivers. By restricting vaccination to only risk groups, a larger fraction of the  
282 general population will be exposed to SARS-CoV-2 implying that contact and travel restrictions  
283 would remain necessary to contain transmission. Such measures come at great economic cost.  
284 Based on our results it would be recommended to follow a combined strategy to employ exten-  
285 sive testing where transmission chains are traceable, e.g. among less mobile population groups,  
286 and to combine this with a vaccination strategy aiming to prevent cryptic transmission.

287 It is important to clearly state additional assumptions and limitations of our approach to put  
288 it in context with previous studies. All data used in this analysis provide the highest level of

289 detail achievable in the setting of an urban area, yet it they are far from individual level data  
290 or a large scale population level analysis. The estimate of the fraction of unreported cases and  
291 the assumption of it to be constant both over time and between population groups is a further  
292 simplification that was inevitable in light of the available data. It is assumed that testing rates  
293 may be biased towards socioeconomic levels. In contrast to other countries, COVID-19 testing  
294 was covered by the obligatory health insurance in Switzerland which may reduce, yet not fully  
295 prevent testing bias. It would be expected that the reported difference in transmission between  
296 socioeconomic groups may indeed be stronger than reported in this analysis. The choice of  
297 a continuum model excluded the possibility to account for stochastic superspreading events  
298 and we further did not account for continuous importations of cases. The presence of a signif-  
299 icant superspreading event was indeed ruled out by our WGS analysis, whereas the restriction  
300 to a single variant predominantly reported in Basel-city limited the impact of potential case  
301 imports. Despite these limitations, we were able to obtain comparable results in terms of the  
302 impact of mobility and socioeconomic status as previously reported motivating the application  
303 of our approach for meaningful scenario building.

304 In conclusion, high-resolution city-level epidemiological studies are essential for understand-  
305 ing factors affecting pandemic transmission chains and thereby supporting tailored public health  
306 information campaigns and vaccination distribution strategies at the municipal level. We here  
307 provided an example of such an analysis within a representative medium-sized European city  
308 at the core of the Greater Basel area and part of the Upper Rhine Region Metropolitan Economy,  
309 which suggests that the findings and modelling approaches presented may be readily translated

310 to other such areas.

## 311 **Materials and Methods**

312 Detailed methods are given in the supplements.

313 **Included data.** All analyses were based on PCR-positive (750/7073 tests) cases of residents of  
314 Basel-City between February 25<sup>th</sup> and April 22<sup>nd</sup> 2020, obtained from the University Hospital  
315 Basel, covering 81% of all reported cases in the relevant interval and location. All samples were  
316 subjected to WGS, 53% resulted in high quality genomes (i.e. 44% of all cases). Of these 247  
317 (247/411, 60%) contained the monophyletic C15324T mutation in the B.1 lineage (B.1-C15324T)  
318 and were used for further analysis. Each case was linked to the patient's place of residence  
319 anonymized to one of 1,078 statistical housing-blocks. For each of these housing-blocks, where  
320 privacy legislation permitted, Basel-City's Cantonal Statistical Office provided socioeconomic  
321 indicators for the year of 2017 (most recent available). These included (i) living space (per capita  
322 in  $m^2$ ), (ii) share of 1-person private households, (iii) median income (CHF), and (iv) popula-  
323 tion seniority (percentage of citizens aged over 64 years). According to these indicators, blocks  
324 were allocated to one of three socioeconomic tertiles (T1: $\leq$ 33rd percentile, T2: 33rd to 66th  
325 percentile, T3: $>$ 66th percentile, N/A: no available data or censored) where possible (e.g. Figure  
326 3A). Generally, sparsely populated blocks displayed a maximum of three positive cases and had  
327 to be excluded from analysis. All following analyses with respect to socioeconomic factors were  
328 based on these partitions.



329 We determined SARS-CoV-2 antibody responses in 2,019 serum samples collected between 25<sup>th</sup>  
330 of February and 22<sup>nd</sup> of May 2020 to account for delayed seroconversion (see supplement for  
331 details). An estimated 1.9% (38/2,019) of the Basel-City population was infected with SARS-  
332 CoV-2, corresponding to 88% unreported cases for the sequenced B.1-C15324T variant (see sup-  
333 plement).

334 Finally, we included data on the number and age distribution of COVID-19 intensive-care unit  
335 (ICU) patients during the relevant period from University Hospital Basel, a tertiary hospital with  
336 a capacity of 44 ICU beds: 4.5% of reported SARS-CoV-2 positive cases were admitted to ICU  
337 and median length of ICU stay was 5.9 days (IQR, 1.5-12.9). 40% of these patients were younger  
338 than 64 years.

339 **Phylogenetic inference and cluster analysis.** SARS-CoV-2 genomes were phylogenetically anal-  
340 ysed in a global context as described previously<sup>23</sup> (see supplements). Phylogenetic clusters were  
341 consolidated with epidemiological data (occupation in a health service job, resident of a care  
342 home, contact to positive cases, onset of symptoms, place of infection) to confirm the suitability  
343 of the divergence parameter chosen and then combined with ancillary geographic (quar-  
344 ter), and socioeconomic information as described above. We inferred statistical significance for  
345 clusters in respective tertiles.

346 **Mobility data.** We employed the official traffic model provided by the traffic department of  
347 Basel-City<sup>38</sup> consisting of the 2016 average A-to-B traffic on a grid of ~1400 counting zones

348 for foot, bike, public motorized and private motorized transport. We computed the spatial  
349 variation of mobility within and between each of the socioeconomic partitions (see supple-  
350 ment) resulting in a unity-normalized three-by-three mobility matrix  $M_{jk}$  representing rela-  
351 tive within-tertile/inter-tertile mobility on/off its diagonal. Additionally, weekly averages of  
352 pass-by traffic for combined foot-bike traffic, as well as private motorized traffic were obtained  
353 together with weekly public-transport passenger loads (from SBB Swiss Federal Railways and  
354 Basel-Verkehrsbetriebe). These were combined in a weighted sum according to the relevant  
355 transport mode contribution, normalized and smoothed with a uni-variate spline to obtain the  
356 final temporal mobility variation,  $\alpha_{mob}(t)$ .

357 **Dynamic changes in social interaction.** SARS-CoV-2 transmission is contact-based. While  
358 the number of contacts is largely influenced by human mobility, the risk of a contact becoming a  
359 transmission event is further determined by the precautions taken by the individuals in contact  
360 (washing hands, wearing masks, distance keeping) resulting in an effective, time-dependent  
361 reproductive number  $R_{eff}(t)$ . We derive the relevant time-dependence of  $R_{eff}(t)$  by applying a  
362 Kalman filter<sup>39,40</sup> to the piece-wise linearised time-series of daily confirmed B.1-C15324T cases.  
363 Assuming a multiplicative model, the time-dependence of transmission risk stemming from  
364 social interaction  $\alpha_{soc}(t)$ , is obtained by point-wise division of the time-dependence of  $R_{eff}(t)$   
365 by  $\alpha_{mob}(t)$  (Figure 3D).

366 **SEIR-model.** We used a compartmental two-arm susceptible-exposed-infected-recovered (SEIR)  
 367 model<sup>19,41,42</sup> including sequenced and unsequenced/unreported cases that is outlined in Fig-  
 368 ure 1 using the following compartments:  $S$  (susceptibles),  $E$  (exposed, latency period  $T_{inc}$ ),  $P$   
 369 (presymptomatic, infectious time  $T_{infP}$ ),  $I$  (reported infectious, isolated),  $U_i$  (unreported in-  
 370 fectious, infectious time  $T_{infU}$ ),  $U_r$  (unreported recovered). The initial number of susceptibles  
 371 was fixed to the relevant population. All other compartments were initialized as zeros, apart  
 372 from a seed in  $E$  corresponding to the first reported cases. In summary, our model is based  
 373 only on six free parameters: the reproductive number per tertile  $R_j$  (three parameters, range  
 374  $[0, 20]$ ), the initial number of exposed in a single tertile (range  $[0, 20]$ ), the infectious times  $T_{infP}$   
 375 (range  $[2., 12]$  days) and latency period  $T_{inc}$  (range  $[2., 12]$  days)<sup>43</sup>. Since it was not possible to  
 376 distinguish the fit for  $T_{infP}$  and  $T_{infU}$ , we assumed a value of two days for the latter infectious  
 377 time. The ODE system was implemented in python (version 3.8.) using the scipy functions  
 378 *odeint* to iteratively solve the system of equations. Model fitting was performed on absolute  
 379 (i.e. not cumulative) case numbers simultaneously for all partitions based on the least squares  
 380 method using the *lmfit* library (version 1.0.2<sup>44</sup>). Posterior probability distributions of the fitted  
 381 parameters were estimated using the Markov Chain Monte Carlo method implemented via the  
 382 *emcee* algorithm<sup>45</sup>. We report median values with 95% confidence intervals corresponding to  
 383 the range of the 2.275th and 97.275th percentiles. We compare effective reproductive numbers  
 384 corresponding to the normalization of  $R$  by the effective mobility contribution ( $\sum_k M_{jk}$ ):

$$385 R_{eff,j} = \frac{R_j}{\sum_k M_{jk}} \quad (1)$$

386 Significance levels of  $R_{eff}$  between tertiles are scored based on a comparison to 99 random  
387 partitions of the statistical blocks to a 5%, Bonferoni corrected significance threshold.

388 **Scenario simulation.** The impact of mobility relative to social interaction was analysed by  
389 recalculating the predicted epidemic trajectory under the constraint of constant ( $\alpha_{mob}(t) = 1$ )  
390 mobility. This scenario was compared to the baseline of observed reduction in mobility.  
391 Vaccination scenarios were simulated for 70-90% effective vaccines to prevent COVID-19<sup>46-48</sup>,  
392 as well as 60% and 90% efficacies to prevent SARS-CoV-2 transmission. The effectively immu-  
393 nized fraction of the population was moved to the recovered compartment  $U_r$ . We accounted  
394 for a change in social interaction behaviour following vaccination by assigning a mean social  
395 interaction score of the vaccinated and not-vaccinated population amongst the initial suscep-  
396 tibles ( $\alpha_{soc,vacc}(t) = 0.75$ ,  $\alpha_{soc,novacc}(t) = 0.5$ ). Full mobility was modelled ( $\alpha_{mob}(t) = 1$ ) after a  
397 single exposed individual was introduced into each of the tertiles. All scenarios were compared  
398 to the no-vaccine case (V0): vaccination of a fixed population fraction at random (V1); vacci-  
399 nation of different population groups (V2: exclusively from T1 median income, V3: exclusively  
400 from T3 seniority, V4: 50% from T1 median income, 50% from T3 seniority). In addition to  
401 case numbers, the time to reach 50% of ICU capacity was determined as quantifiable endpoint  
402 indicating healthcare system burden. In case of not-random vaccination, we adjusted the rele-  
403 vant fraction of ICU cases based on the represented proportions of senior population fractions  
404 within all susceptibles.

405 **Acknowledgements** We greatly appreciate the input and data received from Construction- and Traffic

406 department Canton Basel-City, Baselland Transport AG, Basler Verkehrs-Betriebe, Autobus AG Liestal,  
407 SBB Federal Railways, Statistical Office of the Canton of Basel-City, and want to specifically thank Björn  
408 Lietzke, Lukas Mohler, and Madeleine Imhof (all Statistical Office of the Canton of Basel-City), from  
409 Construction- and Traffic Department of the Canton of Basel-City Michael Redle and Kathrin Grotrian,  
410 Matthias Hofmann (Basler Verkehrs-Betrieb), Roman Stingelin (Autobus AG), Nadine Ruch (SBB AG) and  
411 Stefan Burtschi (Baselland Transport AG) for their support. We thank Christine Kiessling, Magdalena  
412 Schneider, Elisabeth Schultheiss, Clarisse Straub, and Rosa-Maria Vesco (University Hospital Basel) for  
413 excellent technical assistance with next generation sequencing. Computations were performed at sci-  
414 CORE (<http://scicore.unibas.ch>) scientific computing facility at the University of Basel. Data exchange  
415 was organized via the BioMedIT node between the University of Basel and ETH Zurich, Department of  
416 Biosystem Science and Engineering. We thank all authors, who have shared their genomic data on GI-  
417 SAID, especially the Stadler Lab from ETH Zurich for sharing Swiss sequences. A full table (csv) outlining  
418 the originating and submitting labs is included as a supplementary file. This study was supported by  
419 the Alfried Krupp Prize for Young University Teachers of the Alfried Krupp von Bohlen und Halbach-  
420 Stiftung (KB). We finally thank Dr. A. Jermy (Geminate Science Consulting) for his critical review of the  
421 manuscript.

422 **Author contributions** AE, HHH, KB devised the project. SCB and JK developed and performed the  
423 mathematical modelling. MSt performed and interpreted phylogenetic analyses. SCB, JK and MSt led  
424 the writing and revising of the report. AM provided the genome assembly pipeline. TCR and HSS pre-  
425 pared viral RNA for sequencing. MyB and RSS provided geographical expertise. RSS provided detailed  
426 background on the representative status of Basel-City. KKS collected clinical data. KR, DAT, AG, AKS,  
427 MSch analysed serology samples. DC and OD provided serology samples from Viollier AG. KL provided

428 virological expertise. AB provided serology samples from the blood transfusion service. JB, STS and SF  
429 provided public health and epidemiological expertise. HP, MSi, CHN, RB, MB provided clinical exper-  
430 tise and valuable discussion on the results. NR, UH, JB provided epidemiological expertise. All author  
431 reviewed and edited the manuscript.

432 **Competing Interests** The authors declare that they have no competing financial interests.

433 **Correspondence** Correspondence and requests for materials should be addressed to Adrian Egli,  
434 adrian.egli@usb.ch, Clinical Bacteriology and Mycology, University Hospital Basel, Petersgraben,  
435 CH-4031 Basel, Switzerland, Phone: +41 61 556 57 49.

436

437 **Data Availability** The SEIR-model code used for this submission will be available on <https://github.com/BorgwardtLab>  
438 Code that was used for phylogenetic inference and calculation of significance of clusters in specified  
439 groups is available at <https://github.com/appliedmicrobiologyresearch>. SARS-CoV-2 whole genomes  
440 from Basel-City are available at [gisaid.com](https://gisaid.com) and at European Nucleotide Archive (ENA) under accession  
441 number PRJEB39887.

442

443 **Ethical statement** Ethical approval was given by the local ethical committee *Ethik Kommission Nord-*  
444 *west und Zentralschweiz* (EKNZ No. 2020-00769, to be found at <https://ongoingprojects.swissethics.ch>)  
445 and the project was registered at [clinicaltrials.gov](https://clinicaltrials.gov) under NCT04351503.

446 **References**

- 448 1. Yuan, F., Wang, L., Fang, Y. & Wang, L. Global SNP analysis of 11,183 SARS-CoV-2  
449 strains reveals high genetic diversity. *Transboundary and emerging diseases* (2020). URL  
450 <http://www.ncbi.nlm.nih.gov/pubmed/33207070>.
- 451 2. Nabil, B., Sabrina, B. & Abdelhakim, B. Transmission route and introduction of  
452 pandemic SARS-CoV-2 between China, Italy, and Spain. *Journal of medical vi-*  
453 *rology* (2020). URL <http://www.ncbi.nlm.nih.gov/pubmed/32697346>  
454 <http://www.pubmedcentral.nih.gov/articlerender.fcgi?artid=PMC7404595>.
- 455 3. Hadfield, J. *et al.* NextStrain: Real-time tracking of pathogen evolution. *Bioinformatics* **34**,  
456 4121–4123 (2018). URL <https://pubmed.ncbi.nlm.nih.gov/29790939/>.
- 457 4. Worobey, M. *et al.* The emergence of SARS-CoV-2 in Europe and  
458 North America. *Science (New York, N.Y.)* **370**, 564–570 (2020). URL  
459 <https://science.sciencemag.org/content/370/6516/564.full>.
- 460 5. Popa, A. *et al.* Genomic epidemiology of superspreading events in Austria reveals mu-  
461 tational dynamics and transmission properties of SARS-CoV-2. *Science translational*  
462 *medicine* (2020). URL <http://www.ncbi.nlm.nih.gov/pubmed/33229462>.
- 463 6. Candido, D. S. *et al.* Evolution and epidemic spread of SARS-  
464 CoV-2 in Brazil. *Science (New York, N.Y.)* **369**, 1255–1260 (2020).

- 465 URL <http://www.ncbi.nlm.nih.gov/pubmed/32703910>  
466 <http://www.pubmedcentral.nih.gov/articlerender.fcgi?artid=PMC7402630>.
- 467 7. Salje, H. *et al.* Estimating the burden of SARS-CoV-2 in France. *Science (New York, N.Y.)*  
468 **369**, 208–211 (2020). URL <http://www.ncbi.nlm.nih.gov/pubmed/32404476>  
469 <http://www.pubmedcentral.nih.gov/articlerender.fcgi?artid=PMC7223792>.
- 470 8. Gudbjartsson, D. F. *et al.* Spread of SARS-CoV-2 in the Icelandic Population. *New England*  
471 *Journal of Medicine* **382**, 2302–2315 (2020).
- 472 9. Post, L. A. *et al.* A SARS-CoV-2 Surveillance System in Sub-Saharan Africa: Modeling Study  
473 for Persistence and Transmission to Inform Policy. *Journal of medical Internet research*  
474 **22**, e24248 (2020). URL <http://www.ncbi.nlm.nih.gov/pubmed/33211026>  
475 <http://www.pubmedcentral.nih.gov/articlerender.fcgi?artid=PMC7683024>.
- 476 10. Puenpa, J. *et al.* Molecular epidemiology of the first wave of severe acute respiratory syn-  
477 drome coronavirus 2 infection in Thailand in 2020. *Scientific Reports* **10** (2020). URL  
478 <https://pubmed.ncbi.nlm.nih.gov/33024144/>.
- 479 11. Du, P. *et al.* Genomic surveillance of COVID-19 cases in Beijing. *Nature communica-*  
480 *tions* **11**, 5503 (2020). URL <http://www.ncbi.nlm.nih.gov/pubmed/33127911>  
481 <http://www.pubmedcentral.nih.gov/articlerender.fcgi?artid=PMC7603498>.
- 482 12. Lemieux, J. *et al.* Phylogenetic analysis of SARS-CoV-2 in the Boston  
483 area highlights the role of recurrent importation and superspread-  
484 ing events. *medRxiv : the preprint server for health sciences* **12**, 15



- 485 (2020). URL <http://www.ncbi.nlm.nih.gov/pubmed/32869040>  
486 <http://www.pubmedcentral.nih.gov/articlerender.fcgi?artid=PMC7457619>.
- 487 13. Long, S. W. *et al.* Molecular Architecture of Early Dissemination and Mas-  
488 sive Second Wave of the SARS-CoV-2 Virus in a Major Metropolitan Area.  
489 *medRxiv* (2020). URL <http://www.ncbi.nlm.nih.gov/pubmed/33024977>  
490 <http://www.pubmedcentral.nih.gov/articlerender.fcgi?artid=PMC7536878>.
- 491 14. Maurano, M. T. *et al.* Sequencing identifies multiple early introductions of SARS-  
492 CoV-2 to the New York City region. *Genome research* **30**, 1781–1788 (2020). URL  
493 <http://www.ncbi.nlm.nih.gov/pubmed/33093069>.
- 494 15. Bushman, D. *et al.* Detection and Genetic Characterization of  
495 Community-Based SARS-CoV-2 Infections - New York City, March  
496 2020. *MMWR. Morbidity and mortality weekly report* **69**, 918–922  
497 (2020). URL <http://www.ncbi.nlm.nih.gov/pubmed/32678072>  
498 <http://www.pubmedcentral.nih.gov/articlerender.fcgi?artid=PMC7366849>.
- 499 16. Kissler, S. M. *et al.* Reductions in commuting mobility correlate with geographic  
500 differences in SARS-CoV-2 prevalence in New York City. *Nature communications*  
501 **11**, 4674 (2020). URL <http://www.ncbi.nlm.nih.gov/pubmed/32938924>  
502 <http://www.pubmedcentral.nih.gov/articlerender.fcgi?artid=PMC7494926>.
- 503 17. EUROSTAT. Population Data Collection for European Lo-  
504 cal Administrative Units from 1960 onward (2011). URL

- 505 <https://ec.europa.eu/eurostat/web/nuts/local-administrative-units>.
- 506 18. De Ridder, D. *et al.* Socioeconomically disadvantaged neighborhoods face increased  
507 persistence of sars-cov-2 clusters. *Frontiers in Public Health* **8**, 1091 (2021). URL  
508 <https://www.frontiersin.org/article/10.3389/fpubh.2020.626090>.
- 509 19. Chang, S. *et al.* Mobility network models of COVID-19 ex-  
510 plain inequities and inform reopening. *Nature* (2020). URL  
511 <http://www.nature.com/articles/s41586-020-2923-3>.
- 512 20. Koo, J. R. *et al.* Interventions to mitigate early spread of SARS-CoV-2 in Singa-  
513 pore: a modelling study. *The Lancet Infectious Diseases* **20**, 678–688 (2020). URL  
514 <https://linkinghub.elsevier.com/retrieve/pii/S1473309920301626>.
- 515 21. Mansilla Domínguez, J. M. *et al.* Risk Perception of COVID-19 Community Transmission  
516 among the Spanish Population. *International journal of environmental research and public*  
517 *health* **17** (2020). URL <http://www.ncbi.nlm.nih.gov/pubmed/33276532>.
- 518 22. Ragonnet-Cronin, M. *et al.* Automated analysis of phylogenetic clusters. *BMC Bioinformat-*  
519 *ics* **14**, 317 (2013).
- 520 23. Stange, M. *et al.* SARS-CoV-2 outbreak in a tri-national urban area is domi-  
521 nated by a B.1 lineage variant linked to a mass gathering event. *medRxiv; ac-*  
522 *cepted for publication in PLOS Pathogens* 2020.09.01.20186155 (2021). URL  
523 <https://doi.org/10.1101/2020.09.01.20186155>.

524  
525  
526  
527  
528  
529  
530  
531  
532  
533  
534  
535  
536  
537  
538  
539  
540  
541  
542  
543

24. Jay, J. *et al.* Neighbourhood income and physical distancing during the COVID-19 pandemic in the United States. *Nature human behaviour* (2020). URL <http://www.ncbi.nlm.nih.gov/pubmed/33144713>.

25. De Ridder, D. *et al.* Socioeconomically Disadvantaged Neighborhoods Face Increased Persistence of SARS-CoV-2 Clusters. *Frontiers in Public Health* **8** (2021). URL <https://www.frontiersin.org/articles/10.3389/fpubh.2020.626090/full>.

26. Bluhm, A. *et al.* SARS-CoV-2 transmission routes from genetic data: A Danish case study. *PLOS ONE* **15**, e0241405 (2020). URL <https://dx.plos.org/10.1371/journal.pone.0241405>.

27. United Nations, Department of Economic and Social Affairs, Population Division. *World Urbanization Prospects: The 2018 Revision* (United Nations, New York, 2019). URL <https://population.un.org/wup/Publications/Files/WUP2018-Report.pdf>.

28. European Commission. GDP per capita, consumption per capita and price level indices (2021). URL <https://ec.europa.eu/eurostat/statistics-explained/index.php/GDP>.

29. Rader, B. *et al.* Crowding and the shape of COVID-19 epidemics. *Nature Medicine* **26**, 1829–1834 (2020). URL [nature.com/articles/s41591-020-1104-0#citeas](https://www.nature.com/articles/s41591-020-1104-0#citeas).

30. Douglas, J. *et al.* Phylodynamics reveals the role of human travel and contact tracing in controlling COVID-19 in four island nations. *medRxiv* (2020).

31. Burki, T. Mass testing for COVID-19. *The Lancet Microbe* **1**, e317 (2020). URL <https://linkinghub.elsevier.com/retrieve/pii/S2666524720302056>.

544  
545  
546  
547  
548  
549  
550  
551  
552  
553  
554  
555  
556  
557  
558  
559  
560  
561  
562  
563

32. Reeves, R. & Rothwell, J. Class and covid: How the less affluent face double risks. *brookings* (march 27) (2020).

33. Rodríguez-Barranco, M. *et al.* The spread of SARS-CoV-2 in Spain: Hygiene habits, sociodemographic profile, mobility patterns and comorbidities. *Environmental Research* **192**, 110223 (2021).

34. Wilson, C. These graphs show how covid-19 is ravaging new york city's low-income neighborhoods. *Time* (2020).

35. Swan, D. A. *et al.* Vaccines that prevent sars-cov-2 transmission may prevent or dampen a spring wave of covid-19 cases and deaths in 2021. *medRxiv* (2020). URL <https://www.medrxiv.org/content/early/2020/12/14/2020.12.13.20248120>.  
<https://www.medrxiv.org/content/early/2020/12/14/2020.12.13.20248120.full>

36. Moghadas, S. M. *et al.* The impact of vaccination on COVID-19 outbreaks in the United States. *medRxiv : the preprint server for health sciences* (2020). URL <http://www.ncbi.nlm.nih.gov/pubmed/33269359>  
<http://www.pubmedcentral.nih.gov/articlerender.fcgi?artid=PMC7709178>.

37. Anderson, R. M., Vegvari, C., Truscott, J. & Collyer, B. S. Challenges in creating herd immunity to SARS-CoV-2 infection by mass vaccination. *The Lancet* **396**, 1614–1616 (2020). URL <https://linkinghub.elsevier.com/retrieve/pii/S0140673620323187>.

38. Bau- und Verkehrsdepartement Basel-Stadt Mobilität / Mobilitätsstrategie. Gesamtverkehrsmodell der Region Basel, Basismodell: "Ist-Zustand 2016" (2020).

- 564 39. Kalman, R. E. *et al.* Contributions to the theory of optimal control. *Bol. soc. mat. mexicana*  
565 **5**, 102–119 (1960).
- 566 40. Welch, G., Bishop, G. *et al.* An introduction to the kalman filter (1995).
- 567 41. Chinazzi, M. *et al.* The effect of travel restrictions on the spread of the 2019  
568 novel coronavirus (COVID-19) outbreak. *Science* **368**, 395–400 (2020). URL  
569 <https://www.sciencemag.org/lookup/doi/10.1126/science.aba9757>.
- 570 42. Li, R. *et al.* Substantial undocumented infection facilitates the rapid dissemi-  
571 nation of novel coronavirus (SARS-CoV-2). *Science* **368**, 489–493 (2020). URL  
572 <https://www.sciencemag.org/lookup/doi/10.1126/science.abb3221>.
- 573 43. He, X. *et al.* Temporal dynamics in viral shedding and transmis-  
574 sibility of COVID-19. *Nature Medicine* **26**, 672–675 (2020). URL  
575 <https://www.nature.com/articles/s41591-020-0869-5>.
- 576 44. Newville, M., Stensitzki, T., Allen, D. B. & Ingargiola, A. LMFIT: Non-  
577 Linear Least-Square Minimization and Curve-Fitting for Python (2014). URL  
578 <https://doi.org/10.5281/zenodo.11813>.
- 579 45. Foreman-Mackey, D., Hogg, D. W., Lang, D. & Goodman, J. emcee : The MCMC Ham-  
580 mer. *Publications of the Astronomical Society of the Pacific* **125**, 306–312 (2013). URL  
581 <http://iopscience.iop.org/article/10.1086/670067>.
- 582 46. AstraZeneca. AZD1222 vaccine met primary efficacy endpoint in preventing COVID-19  
583 (2020).

- 584 47. Mahase, E. Covid-19: Moderna vaccine is nearly 95% effective, trial involving high risk and  
585 elderly people shows. *BMJ: British Medical Journal (Online)* **371** (2020).
- 586 48. Dagan, N. *et al.* Bnt162b2 mrna covid-19 vaccine in a nation-  
587 wide mass vaccination setting. *New England Journal of Medicine*  
588 **0**, null (0). URL <https://doi.org/10.1056/NEJMoa2101765>.  
589 <https://doi.org/10.1056/NEJMoa2101765>.
- 590 49. Leuzinger, K. *et al.* Epidemiology of Severe Acute Respiratory Syndrome Coronavirus 2  
591 Emergence Amidst Community-Acquired Respiratory Viruses. *The Journal of infectious dis-*  
592 *eases* (2020). URL <http://www.ncbi.nlm.nih.gov/pubmed/33180912>.
- 593 50. Kanton Basel-Stadt Datenportal (data.bs.ch 2021). Coronavirus (COVID-19): Fallzahlen  
594 Basel-Stadt (2021). URL <https://data.bs.ch/explore/dataset/100073>.
- 595 51. Statistisches Amt Basel-Stadt: Bevölkerungsstatistik. Statistisches Jahrbuch des Kantons  
596 Basel-Stadt: Wohnbevölkerung nach Geburtsjahr, Heimat und Geschlecht [t01.1.14] (2021).
- 597 52. Elbe, S. & Buckland-Merrett, G. Data, disease and diplomacy: GISAID's inno-  
598 vative contribution to global health. *Global Challenges* **1**, 33–46 (2017). URL  
599 <https://pubmed.ncbi.nlm.nih.gov/31565258/>.
- 600 53. Shu, Y. & McCauley, J. GISAID: Global initiative on sharing all influenza  
601 data – from vision to reality. *Eurosurveillance* **22**, 2–4 (2017). URL  
602 <https://www.eurosurveillance.org/content/10.2807/1560-7917.ES.2017.22.13>

- 603 54. Huerta-Cepas, J., Serra, F. & Bork, P. ETE 3: Reconstruction, Analysis, and Visualiza-  
604 tion of Phylogenomic Data. *Molecular Biology and Evolution* **33**, 1635–1638 (2016). URL  
605 <https://academic.oup.com/mbe/article/33/6/1635/2579822>.
- 606 55. Egli, A. *et al.* High-resolution influenza mapping of a city reveals socioeconomic de-  
607 terminants of transmission within and between urban quarters. *bioRxiv* (2020). URL  
608 <https://www.biorxiv.org/content/early/2020/04/04/2020.04.03.023135>.  
609 <https://www.biorxiv.org/content/early/2020/04/04/2020.04.03.023135.full.pdf>.
- 610 56. Krzywinski, M. *et al.* Circos: an information aesthetic for  
611 comparative genomics. *Genome research* **19**, 1639–45 (2009).  
612 URL <http://www.ncbi.nlm.nih.gov/pubmed/19541911>  
613 <http://www.pubmedcentral.nih.gov/articlerender.fcgi?artid=PMC2752132>.
- 614 57. Canton Basel-City, Department of Presidential Affairs, External Affairs  
615 and Marketing 2021: Regional, national and trinational cooperation.  
616 URL: [https://www.marketing.bs.ch/en/institutional-cooperation/tri-national-](https://www.marketing.bs.ch/en/institutional-cooperation/tri-national-cooperation.html)  
617 [cooperation.html](https://www.marketing.bs.ch/en/institutional-cooperation/tri-national-cooperation.html).
- 618 58. TEB-Trinationaler Eurodistrict Basel 2021:<https://www.eurodistrictbasel.eu/de/home.html>.
- 619 59. European Commission Eurostat: Metropolitan regions. URL :  
620 <https://ec.europa.eu/eurostat/web/metropolitan-regions/background>.

- 621 60. Dijkstra, L., Poelman, H. & Veneri, P. The EU-OECD definition of a functional urban area.  
622 OECD Regional Development Working Papers 2019/11, OECD Publishing (2019). URL  
623 <https://ideas.repec.org/p/oec/govaab/2019-11-en.html>.
- 624 61. EURES-T Oberrhein 2021: <https://www.eures-t-oberrhein.eu/>.
- 625 62. Canton Basel-City Statistics Office: Cross-border commuters 2020, based  
626 on Federal Statistics Office Cross-border statistics Indicator I.03.5.2152.  
627 <https://www.statistik.bs.ch/haeufig-gefragt/arbeiten/grenzgaenger.html>.
- 628 63. Perkmann, M. Cross-Border Regions in Europe. *Euro-*  
629 *pean Urban and Regional Studies* **10**, 153–171 (2003). URL  
630 <http://journals.sagepub.com/doi/10.1177/0969776403010002004>.
- 631 64. EURES-T Oberrhein 2021: <https://www.aebr.eu/>.
- 632 65. Randstadt Region 2019 Randstad Monitor 2019. [https://www.nl-prov.eu/wp-](https://www.nl-prov.eu/wp-content/uploads/2019/05/randstad-monitor-gecomprimeerd-2-gecomprimeerd-compressed.pdf)  
633 [content/uploads/2019/05/randstad-monitor-gecomprimeerd-2-gecomprimeerd-](https://www.nl-prov.eu/wp-content/uploads/2019/05/randstad-monitor-gecomprimeerd-2-gecomprimeerd-compressed.pdf)  
634 [compressed.pdf](https://www.nl-prov.eu/wp-content/uploads/2019/05/randstad-monitor-gecomprimeerd-2-gecomprimeerd-compressed.pdf).
- 635 66. Randstadt Region 2017 Randstad Monitor 2017. [https://www.nl-prov.eu/wp-](https://www.nl-prov.eu/wp-content/uploads/2017/11/regio-randstad-monitor-2017.pdf)  
636 [content/uploads/2017/11/regio-randstad-monitor-2017.pdf](https://www.nl-prov.eu/wp-content/uploads/2017/11/regio-randstad-monitor-2017.pdf) .
- 637 67. Trinationale Metropolregion Oberrhein 2021. Wirtschaft. <https://www.rmtmo.eu/de/wirtschaft.html>  
638 .



639 68. Trinationale Metropolregion Oberrhein 2021. Metropolregion.  
640 <https://www.rmtmo.eu/de/metropolregion.html>.



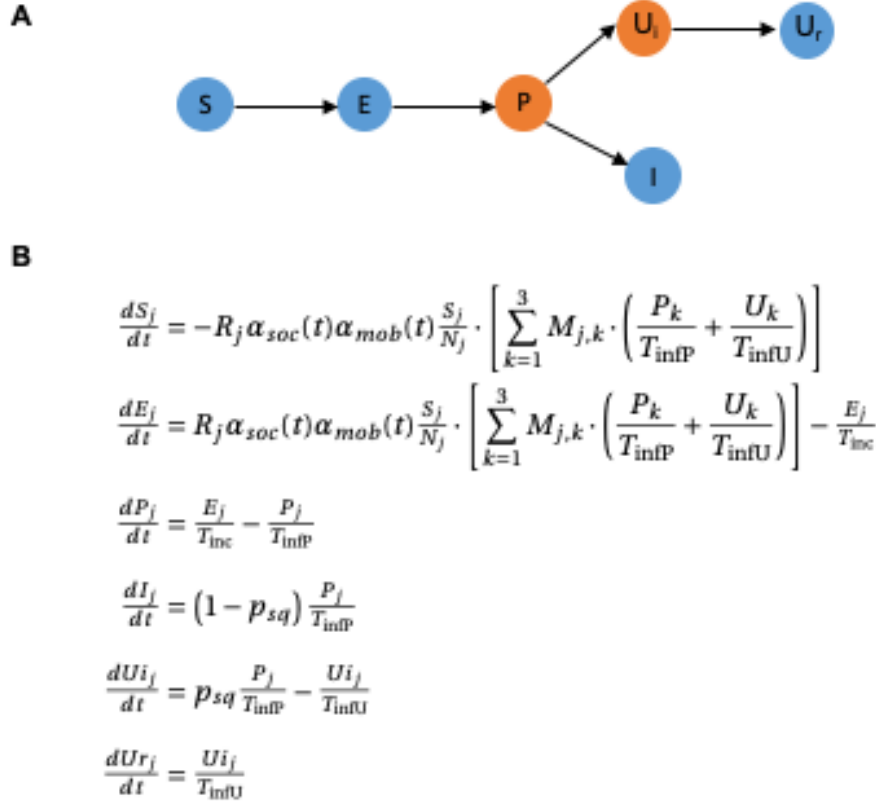

Figure 1: Overview of the SEIR model. A) Conceptual overview. We accounted for susceptibles ( $S$ ), exposed ( $E$ , incubation time  $T_{inc}$ ), and pre-symptomatic yet infectious cases ( $P$ ). After a presymptomatic time  $T_{infP}$ , cases were separated according to the estimated proportion of reported and sequenced cases,  $p_{sq}$ , into either reported infectious ( $I$ ), or unreported infectious ( $U_i$ , reproductive number  $R$ ). Since our data did not include information on recovered patients, a 'recovered' compartment was not included following  $I$ . It was assumed that reported cases remained isolated. The unreported compartment transitions to recovery ( $U_r$ ) after an infectious time  $T_{infU}$ . B) Relevant model equations to incorporate connectivity and exchange between the defined tertiles (index  $j$ ). Cross contamination was included through the mobility matrix  $M_{jk}$  and relevant temporal variation of mobility and social interaction (weighting factors  $\alpha_{mob}(t)$  and  $\alpha_{soc}(t)$ ).

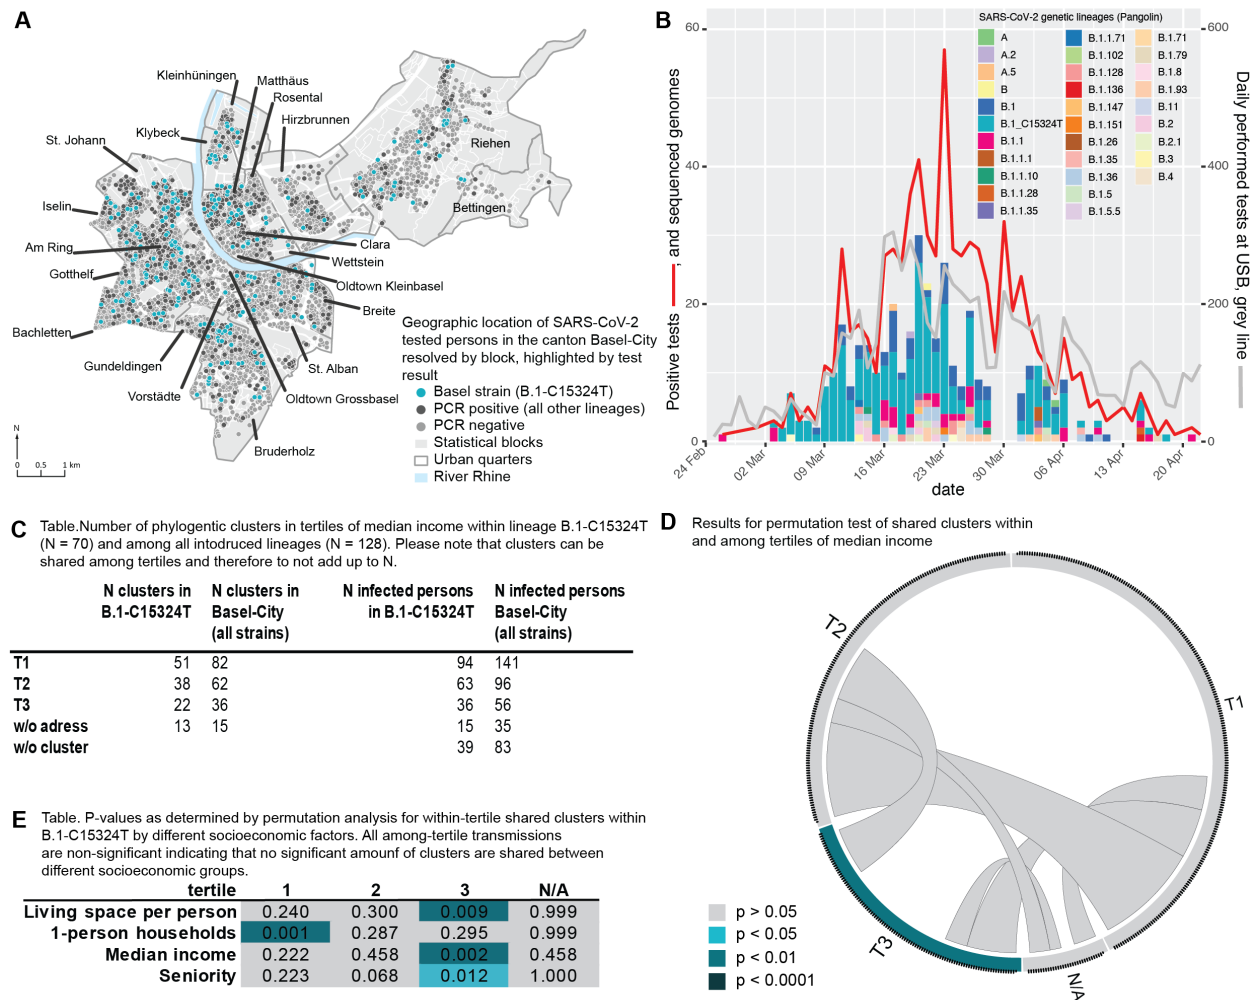

Figure 2: SARS-CoV-2 transmission in and among socioeconomic and demographic groups during the first COVID-19 wave in Basel-City. A) Spatial positive/negative case distribution throughout the city with the most dominant SARS-CoV-2 variant (B.1-C15324T), the focus of this study, highlighted in turquoise. B) Epidemiological curve for Basel-City and distribution of phylogenetic lineages (pangolin nomenclature) from 25<sup>th</sup> of February to 22<sup>nd</sup> of April 2020. C) Summary for inferred phylogenetic clusters within (i) all lineages and (ii) the major variant B.1-C15324T in tertiles of median income. High number of infected people within a tertile with a low number of clusters indicates presence of large transmission clusters whereas large number of clusters and low number of people infected within a tertile indicates random infections and cryptic transmission. D) Visualisation of a significance test for transmission within (indicated on circle edges) and among (intra circle connections) tertiles of median income. E) Results of a significance test for transmission between tertiles of different socioeconomic factors. T1: low, T2: intermediate, T3: high, N/A: no available data or censored for privacy reasons.

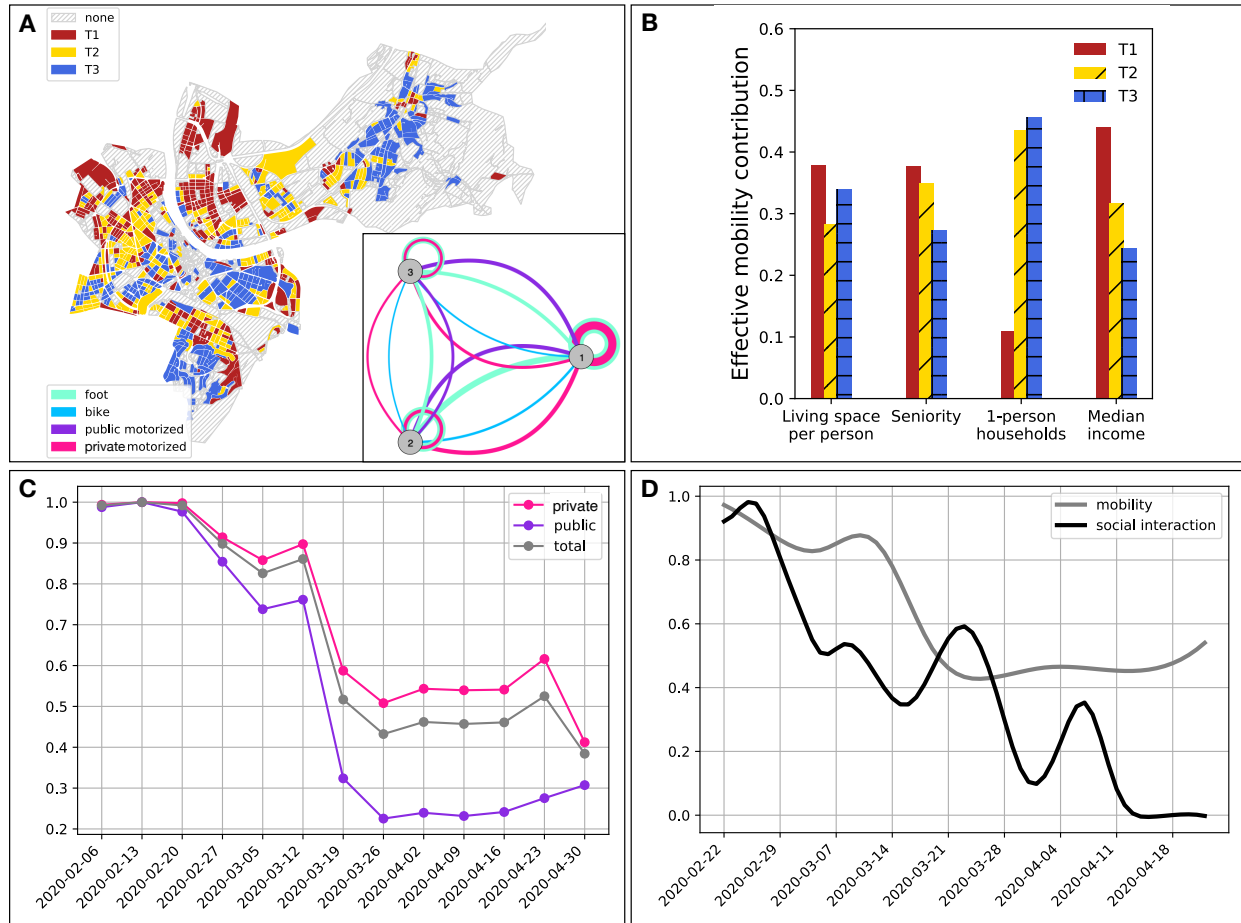

Figure 3: Spatio-temporal variation of mobility patterns within the Canton of Basel-City. A) Basel-City and its delineation with respect to statistical blocks colored according to the partition into tertiles T1, T2, and T3 of increasing median income. Inset: resulting mobility-graph, with nodes representing tertiles and edge-widths representing the strength of effective connectedness through mobility by means of various modes of transport, as computed from the traffic-model provided by the traffic department of the Canton of Basel-City. B) Relative mean contribution of mobility to a socioeconomic tertile's effective reproductive number associated with the major variant B.1-C15324T. C) Normalized temporal development of private and public transport as well as their weighted sum during the first wave of the pandemic in Basel-City. D) Smoothed relative temporal development of social interaction and mobility contribution to the effective reproductive number associated with the major variant B.1-C15324T.

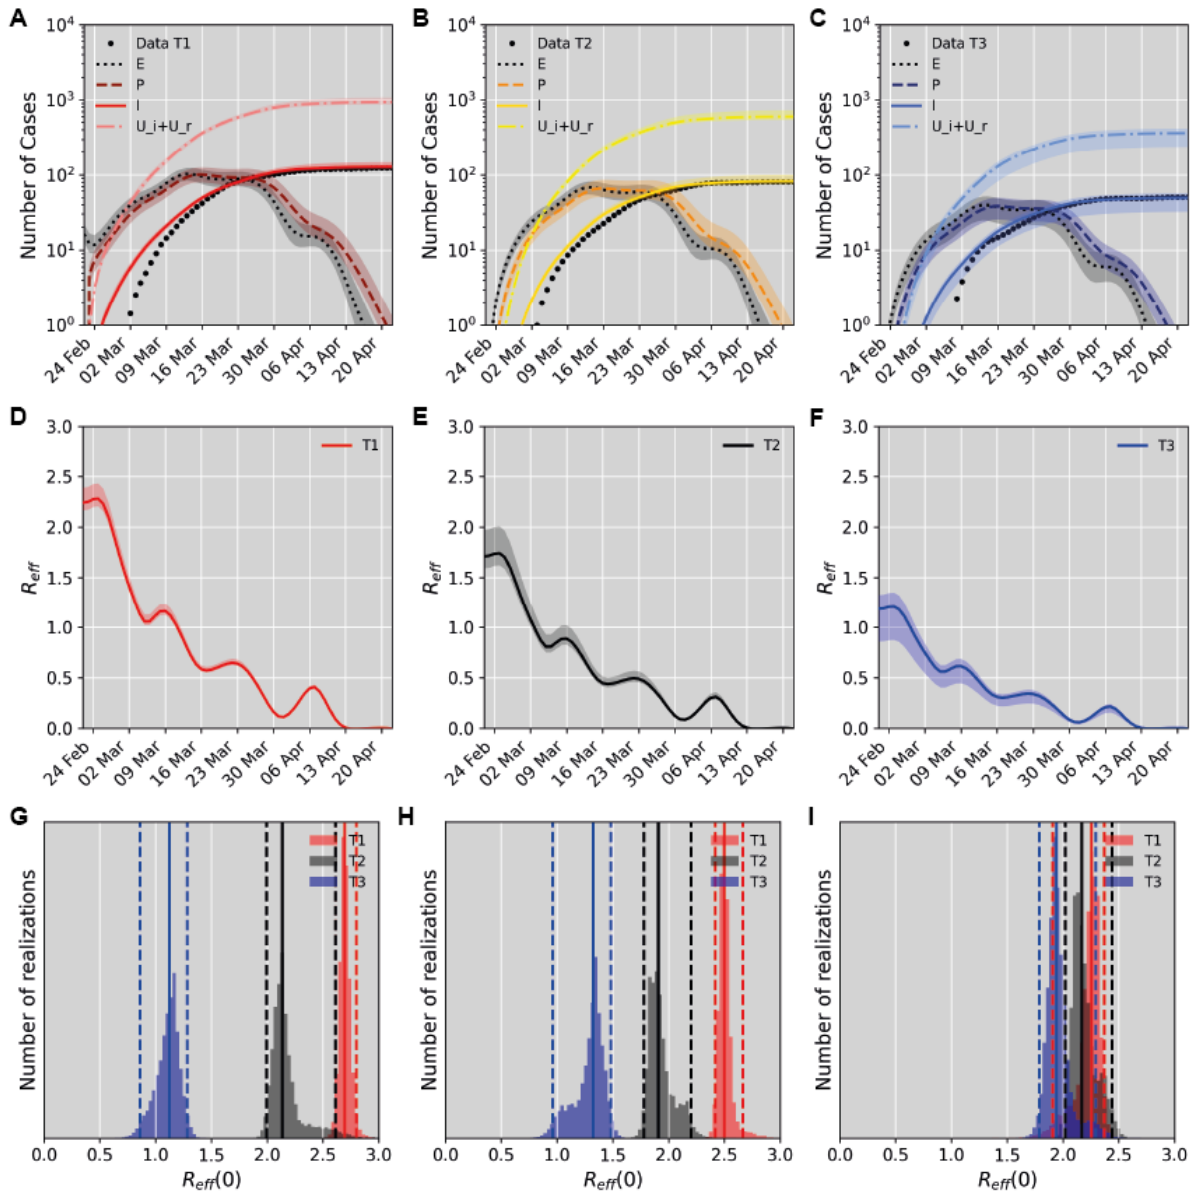

Figure 4: Model fit to the case number time-series. A-C) Fit results for a partition based on median income. Data points are shown together with model simulations (median (lines), and 95% confidence bounds (shaded)) for the different tertiles T1 (low, A), T2 (intermediate, B) and T3 (high median income, C). Model compartments  $E$  (exposed),  $P$  (presymptomatic),  $I$  (reported infectious), and  $U_i + U_r$  (sum of the unreported infectious and recovered cases) are shown. D-F) The dynamic variation of the effective reproductive number for each of the tertiles shown in A-C. Median values (lines) are shown with 95% confidence bounds (shaded). G-I) Pre-lockdown reproductive number for each socioeconomic partition. Parameter distributions obtained using Markov Chain Monte Carlo analysis (histograms) are shown with median values (solid lines) and indicated 95% confidence bounds (dashed lines). Results are shown for partitions based on median income (G), living space per person (H), and share of senior residents (I).

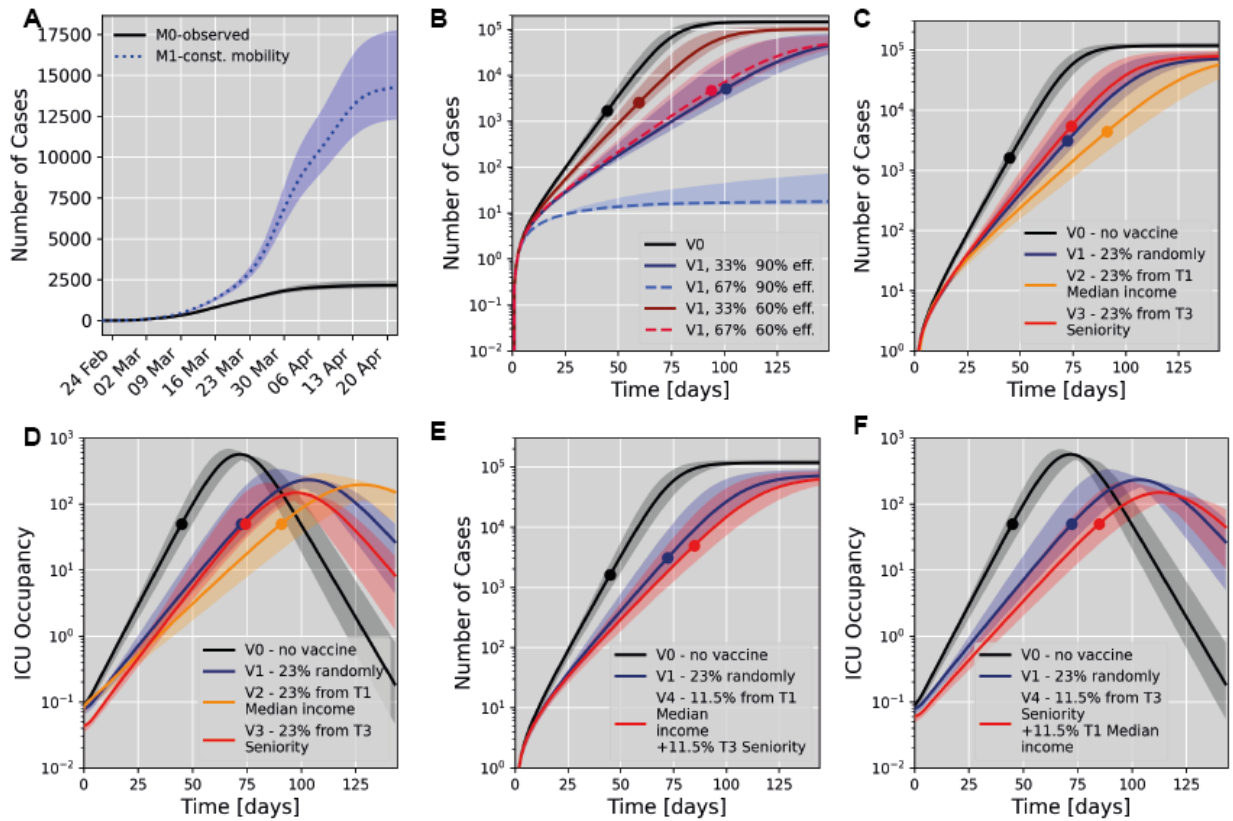

Figure 5: Scenario simulations for a partition based on median income. All subsets A,B,C and E show the total number of infected cases (i.e the sum of compartments  $I$ ,  $U_i$ , and  $U_r$ ). A) Influence of the mobility pattern on the total number of infected cases during the first wave (sum of reported and unreported cases) modelling either no change in mobility (no lockdown scenario, M1) or the observed scenario (MO) is shown. B) Simulation of simulated vaccination effects if a specific percentage of all citizens was randomly selected for vaccination at given efficacy (V1). We compare this to the scenario of no vaccine (V0). \* Here vaccination of different population fractions at either 60% or 90% efficacy to prevent SARS-CoV-2 transmission were modelled. Median values (lines) and 95% confidence bounds (shaded) are shown. C) Simulation of future vaccination effects based on a partition according to median income. Scenario V2 models vaccination of 23% of all citizens selected from the tertile with the lowest median income (T1). Scenario V3 models vaccination of 23% of all citizens selected from the tertile with the highest share of senior residents (T3). In C-E we model 90% vaccine efficacy (transmission and severe COVID-19) and compare with scenarios V0 and V1. Dots indicate the time of reaching a 50% ICU occupancy. D) Temporal evolution of ICU occupancy for the scenarios modelled in C. E) Simulation of a mixed vaccination strategy giving equal priority to senior citizens and mobile population groups. F) Temporal evolution of ICU occupancy for the scenarios modelled in E).

## 642 **Supplementary Material**

### 643 **Research in context**

644 **Evidence before this study:** We searched Google Scholar, PubMed, and medRxiv for articles  
645 with the keywords 'SARS-CoV-2', 'transmission', 'phylogeny', 'city', and 'model' as of February  
646 2021 and evaluated the relevant abstracts and study details where appropriate. The identi-  
647 fied studies predominantly evaluated SARS-CoV-2 transmission within large metropolises with  
648 only a few studies reporting on European cities, including analyses of London and Geneva. We  
649 noted, that studies (even outside Europe) generally differentiated between either phylogenetic  
650 analysis or a dynamic modelling approach and did not combine the two, despite the different  
651 aspects described. Moreover, the majority of studies evaluate publicly available data for mod-  
652 elling SARS-CoV-2 transmission and to estimate effective reproductive numbers. Such analyses  
653 naturally lack a direct relation of cases and relevant socioeconomic, or geographical informa-  
654 tion on a per case basis. To date, whole-genome-sequencing information has not been used  
655 to clearly identify inherently related cases for modelling transmission behaviour in any of the  
656 studies assessed. Finally, of the modelling studies reported, none provided a data-driven es-  
657 timate of vaccine scenarios in a city, for which all model parameters were identified from the  
658 same source.

659 **Added value of this study:** In this comprehensive study we examine SARS-CoV-2 transmission  
660 patterns within a medium-sized European city. We benefit from a rich data set allowing us  
661 to combine phylogenetic clustering with compartmental modelling based exclusively on se-



662 quenced and inherently related cases that are mapped to a residential address, and hence cou-  
663 pled with socioeconomic and demographic information. This allows us to evaluate population  
664 groups driving SARS-CoV-2 transmission and to quantify relevant effective reproductive num-  
665 bers. Moreover, we identify both traceable and cryptic transmission chains allowing us to sug-  
666 gest which measures (such as vaccination vs. effective contact tracing) would be most effective  
667 for each group.

668 **Implications of all the available evidence:** Depending on the specific characteristics of the  
669 vaccine, we estimate that vaccination of exclusively the senior population groups will reduce  
670 intensive-care-unit occupancy, but overall case number would more effectively be contained  
671 by prioritising highly mobile population groups from a socioeconomically weaker background  
672 (i.e. transmission drivers), even in the context of comparably shallow socioeconomic gradients  
673 within a wealthy European urban area. We identified predominantly clustered transmission  
674 amongst more senior or more affluent and less mobile population groups, which implies that  
675 extensive testing strategies could be used to more effectively prevent SARS-CoV-2 transmission  
676 among these groups. By contrast, mobile, low-income population groups were characterized  
677 by cryptic transmission. These are very important findings which could be considered in future  
678 vaccine prioritization designs for comparable urban areas.

679

## 680 1 Detailed Methods

681 **PCR testing and whole-genome sequencing.** PCR testing was available rapidly and frequent  
682 testing was established and supported by local guidelines by the end of February 2020, before  
683 the first case arrived<sup>49</sup>. SARS-CoV-2 testing was made available (i) via a walk-in test center in  
684 the city center affiliated to the University Hospital Basel, which allowed screening of legal-aged  
685 patients with mild and severe symptoms, (ii) via the University Children's Hospital for minors  
686 on recommendation by the pediatricians, and (iii) via the obligatory screening of any incoming  
687 patients to the University Hospital Basel irrespective of symptoms. Testing in case of symptoms  
688 was covered by the Swiss mandatory health insurance scheme preventing sampling bias from  
689 affluent socioeconomic population groups. In total 7073 PCR tests from Basel-City residents  
690 were performed at the University Hospital Basel (UHB) (750 of which were SARS-CoV-2 positive)  
691 dating between 25<sup>th</sup> of February and 22<sup>nd</sup> of April, 2020. The total number of positive cases for  
692 Basel-City including also external testing sources for the same time range was 928, hence the  
693 cases registered at the UHB cover 80.8% of the total case burden<sup>50</sup>. The ratio of negative to  
694 positive PCR tests changed during the local epidemic with a median of 10.6% positive PCR tests  
695 (Figure 2B). We successfully sequenced SARS-CoV-2 whole genomes from 411 unique patients  
696 (54.8% of our cases, 44% of all cases). Of these, 247 (247/411, 60%) could be attributed to contain  
697 the C15324T mutation in the B.1 lineage (and therefore called B.1-C15324T) characteristic to the  
698 virus variant that originated in this tri-national area<sup>23</sup>.

699 **Geographic mapping and socioeconomic stratification.** Basel-City is divided into 21 urban  
700 quarters and had a population of 201,971 in 2020<sup>51</sup> (Figure S6). For subsequent analyses, a total  
701 of 1,078 statistical (housing) blocks (a city block partitioned by e.g. streets, rivers) were iden-  
702 tified within the city quarters. Each individual PCR test (N = 7073), irrespective of the result,  
703 was linked to the patient's place of residence anonymized at the scale of statistical blocks in  
704 ArcMap 10.7 (by ESRI). To explore the statistical association between SARS-CoV-2 transmission  
705 and socioeconomic factors, we employed data provided by the Canton of Basel-City's office for  
706 statistics for the year of 2017 (most recent data available), that specified the values for various  
707 socioeconomic indicators for each statistical block (except for those blocks where privacy leg-  
708 islation did not permit the sharing of such information). The indicators under study were (i)  
709 the living space (per capita in  $m^2$ ), (ii) the share of 1-person private households, (iii) the me-  
710 dian income (CHF), and (iv) the population seniority (percentage of senior citizens aged over  
711 64 years per block). According to these socioeconomic indicators, blocks were allocated to one  
712 of three socioeconomic city tertiles (T1:  $\leq 33$ rd percentile, T2: 33rd to 66th percentile T3:  $> 66$ th  
713 percentile) where possible (e.g. Figure 3A). In general, sparsely populated blocks displayed a  
714 maximum of three positive cases and had to be excluded from analysis. All following analyses  
715 with respect to socioeconomic factors were based on these city partitions.

716 **Phylogenetic inference and cluster analysis.** Whole-SARS-CoV-2-genomes from Basel-City  
717 patients were assembled using our custom analysis pipeline COVGAP<sup>23</sup> ([github.com/appliedmicrobiologyrese](https://github.com/appliedmicrobiologyresearch/COVGAP)  
718 [arch.com/appliedmicrobiologyrese](https://github.com/appliedmicrobiologyresearch/COVGAP) CoV-2/). Global sequences and metadata were downloaded from GISAID<sup>52,53</sup> (as of October

719 22,2020; 155,278 consensus sequences). Sequences with more than 10 percent N's (27,013)  
720 and with incomplete dates (43,466) were removed. 84,799 sequences remained which were  
721 joined with Basel genomes. Filtering for the period of interest until April 22<sup>nd</sup> retained 39,913  
722 genomes, of which 411 are from Basel-City residents dating from February 26<sup>th</sup> (first case) to  
723 April 22<sup>nd</sup>, 2020.

724 To infer relatedness among the viral genomes and spread of SARS-CoV-2 in Basel-City, a time-  
725 calibrated phylogeny that was rooted to the first cases in Wuhan, China from December 2019,  
726 was inferred using a subset of the global genomes. For subsetting, we included 30 genomes  
727 per country and month, whereby all genomes from Basel-City were retained, totalling 3,495  
728 genomes, using the nextstrain software v.2.0.0 (nextstrain.org) and augur v.8.0.0<sup>3</sup> as described  
729 in detail in <sup>23</sup>.

730 The resulting global phylogeny was used to infer phylogenetic clusters in Basel-City. First, poly-  
731 tomies, which are caused by identical genomes in the tree were resolved using ETE3 v.3.1.1<sup>54</sup>.  
732 Cluster Picker v.1.2.3 <sup>22</sup> was then used to identify clusters in the resolved tree (options 0, 0, 4e-  
733 4, 5). Identified clusters were consolidated with epidemiological data (occupation in a health  
734 service job, resident of a care home, contact to positive cases, onset of symptoms, place of in-  
735 fection) to confirm the suitability of the divergence parameter. Cluster Matcher v.1.2.4<sup>22</sup> was  
736 then used to combine ancillary geographic (quarter), and socioeconomic or demographic in-  
737 formation that were subdivided into tertiles on identified clusters.

738 To test whether related genomes in Basel-City cluster according to a) quarter, b) living space per  
739 person, c) share of 1-person households, d) median income, or e) seniority a custom python-

740 script for a random permutation test was performed<sup>55</sup> ([github.com/appliedmicrobiologyresearch/Influenza-](https://github.com/appliedmicrobiologyresearch/Influenza-)  
741 [2016-2017](https://github.com/appliedmicrobiologyresearch/Influenza-2016-2017)). The results for clustering within and among urban quarter and tertiles in socioeco-  
742 nomic determinants were visualized using *circos* v.0.69<sup>56</sup>.

743 **Serology.** SARS-CoV-2 antibody responses were determined in a total of 2,019 serum samples  
744 collected from individuals between 25<sup>th</sup> of February and 22<sup>nd</sup> of May, 2020, to account for se-  
745 roconversion. Serology information was used to estimate the fraction of unreported cases as  
746 follows: An estimated 1.88% (38/2,019) of the Basel-City population was infected with SARS-  
747 CoV-2. Of these 60% would be attributed to the B.1-C15324T variant, leading to a percentage of  
748 88% of unreported/unsequenced cases to consider.

749 **Mobility data.** We employed the official traffic model provided by the traffic department of  
750 Basel-City<sup>38</sup>. The latter consists of the 2016 average A-to-B traffic on a grid of ~1400 count-  
751 ing zones for four transport modalities: foot, bike, public motorized transport and private mo-  
752 torized transport. We further obtained weekly averages of pass-by traffic for the same count  
753 zones over the period of the first wave of the pandemic for the categories of combined foot and  
754 bike traffic, as well as private motorized traffic. Additionally, weekly public-transport passen-  
755 ger loads were provided by both the Swiss Federal Rail Company and the local public transport  
756 services. From these datasets, we computed the spatio-temporal variation of mobility within  
757 the city as follows. Spatial variation was obtained by aggregating A-to-B traffic between the  
758 aforementioned counting zones, first to the statistical block level (by identifying the nearest

759 housing block with respect to a zone's centroid), and second to tertile level via a statistical-  
760 block's association with a socioeconomic indicator tertile. This resulted in a there-by-three mo-  
761 bility matrix  $M_{jk}$  whose diagonal entries represent within-tertile mobility, while off-diagonal  
762 entries represent inter-tertile mobility. This matrix was normalized to one since only relative  
763 differences were relevant in our model. We hence obtained a direct link between mobility and  
764 socioeconomic/demographic information agglomerated based on the unifying scale of statis-  
765 tical blocks. Temporal variation was obtained by computing the weighted sum of the private  
766 transport time-series provided by the traffic department and the public transport time-series  
767 provided the Swiss Federal Rail Company and the local public transport services. This sum was  
768 then normalized and smoothed with a uni-variate spline resulting the final time-series for tem-  
769 poral mobility variation employed in our model (denoted as  $\alpha_{mob}(t)$ ), see Figure 3D).

770 **Dynamic changes in social interaction.** SARS-CoV-2 transmission is contact-based. While  
771 the number of contacts potentially taking place within a day and a city is largely influenced  
772 by human mobility as estimated above, the risk of a contact becoming a transmission event is  
773 further determined by the precautions taken by the two individuals being in contact (such as  
774 washing hands, wearing masks, distance keeping). Both aspects together—mobility and risk-  
775 mitigating social behaviour within a (sub-)population—eventually result in an effective, time-  
776 dependent, reproductive number characterizing the virus's transmission within that (sub-)population.  
777 Hence, there are three relevant time-series: changes in the overall effective reproductive num-  
778 ber, in mobility, and in social behaviour. While the computation of the temporal variations

779 in mobility was described above, the overall time-dependent effective reproductive number is  
780 obtained by applying a Kalman filter<sup>39,40</sup> to the daily case counts of individuals having newly  
781 contracted the B.1-C15324T variant of SARS-CoV-2 in all of Basel-City. To this end, we focus on  
782 the reduced dynamics as described by the  $E$ ,  $P$ , and  $U$  compartments with constant times  $T_{\text{inc}}$ ,  
783  $T_{\text{inf,P}}$  and  $T_{\text{inf,U}}$  (see Figure 1) obtained through a grid search. Changes in the number of sus-  
784 ceptibles  $S$  is slow compared to the other compartments, which allows us to approximate that  
785 number as constant, and thereby linearize the dynamics—enabling the use of a Kalman filter in  
786 the first place. The measurement used to update the filter is  $P(t)$  as observed via the positive  
787 contribution  $p_{\text{sq}} \cdot P(t) / T_{\text{inf,P}}$  to the daily increment of  $U(t)$ . Assuming a multiplicative model,  
788 the time-dependence of residual transmission risk stemming from lack of precaution in social  
789 interaction (denoted as  $\alpha_{\text{soc}}(t)$ ), is obtained by point-wise division of the time-dependence of  
790 the effective reproductive number by the mobility time-series (depicted in Figure 3). Thus we  
791 are adhering to the logic that in the extreme case of zero mobility, no transmission can take  
792 place despite a finite risk of transmission rooted in a lack of precautions, while on the other  
793 hand in the case of zero risk of transmission due to perfect precautions, no transmission can  
794 take place despite non-zero mobility. Such logic dictates the choice of a multiplicative rather  
795 than additive model.

796 **Fitting procedure and evaluation of the SEIR-model.** In total 247 cases within the time pe-  
797 riod from the 25th of February until the 22nd of April were included in this analysis. For all data  
798 a seven day moving window average was taken to account for reporting bias on weekends. We

799 fit absolute numbers of infected cases ( $dI$ ). Due to the loss of single sequencing plate, missing  
800 numbers on the 29th, 30th and 31st of March were imputed by assuming a constant ratio of the  
801 B.1-C15324T variant amongst the sequenced samples. Simulations were initialized on the 22nd  
802 of February, the estimated date of the occurrence of the initial exposed cases<sup>23</sup>.  
803 The ODE system was implemented in python (version 3.8.) using the scipy functions *odeint*  
804 to iteratively solve the system of equations. Data were fit using a least squares method im-  
805 plemented in the *lmfit* library (version 1.0.2<sup>44</sup>) with default parameters. Posterior probabil-  
806 ity distributions of the fitted parameters were estimated using the Markov Chain Monte Carlo  
807 method implemented via the *emcee* algorithm<sup>45</sup> of the *lmfit* library with default parameters. We  
808 report median values with 95% confidence intervals corresponding to the range of the 2.275th  
809 and 97.275th percentiles. The fit was performed simultaneously for all socioeconomic parti-  
810 tions to account for the shared parameters  $T_{infP}$  (obtained 2.3(2.1,2.6) days),  $T_{inc}$  (obtained  
811 2.4(2.3,3.4) days), and  $E_0$  (obtained 12.898.1,14.3)).

812 **Scenario simulation.** The impact of mobility relative to social interaction was analysed by  
813 recalculating the predicted epidemic trajectory under the constraint of constant intra-urban  
814 mobility ( $\alpha_{mob}(t) = 1$ , scenario M1) or fully restricted ( $\alpha_{mob}(t) = 0$ , scenario M2) mobility, cor-  
815 responding to perfect isolation of the affected city areas. These scenarios were compared to the  
816 baseline of the actual reduction in mobility (scenario M0).

817 Vaccination scenarios were simulated as for both 90% and 70% effective vaccines to prevent  
818 COVID-19 resembling current vaccine candidate data<sup>46,47</sup>, as well as a range of vaccine effica-



819 cies to prevent SARS-CoV-2 transmission (60%, 90%). This was achieved by moving the fraction  
820 of the vaccinated and not transmitting population from the susceptible to the recovered com-  
821 partment  $U_r$  and calculating the spread of the pandemic with constant effective reproductive  
822 number and intra-city mobility. We accounted for a change in social interaction behaviour  
823 following vaccination by assigning a mean social interaction score of the vaccinated and not-  
824 vaccinated population amongst the initial susceptibles ( $\alpha_{soc,vacc}(t) = 0.75$ ,  $\alpha_{soc,novacc}(t) = 0.5$ ).  
825 Mobility was modelled as 100% ( $\alpha_{mob}(t) = 1$ ). Two scenarios were investigated and compared  
826 to the no vaccine scenario (V0): i) vaccination of a fixed population fraction (one or two thirds)  
827 randomly throughout the population (scenario V1), ii) vaccination of the corresponding num-  
828 ber of individuals from different socioeconomic groups (scenario V2 (exclusively from T1 me-  
829 dian income), V3 (exclusively from T3 seniority), V4 (50% from T1 median income, 50% from  
830 T3 seniority)). In order gauge the benefit of a particular vaccination scenario, we calculated  
831 the time to reach 50% of intensive care unit (ICU) capacity. The University Hospital Basel has  
832 a total of 44 ICU beds. During the first wave, 4.5% of reported SARS-CoV-2 positive cases were  
833 admitted to ICU, and their median length of ICU stay was 5.9 days (IQR, 1.5-12.9). If consid-  
834 ering additional unreported cases (captured by serological testing), the percentage of patients  
835 requiring ICU admission was 1%. Of all SARS-CoV-2 patients with ICU stay, 40% were younger  
836 than 64 years resulting in a probability of an under 64 year old infected case to be admitted to  
837 ICU of 0.5%. In case of vaccinated populations not at random, we adjust the relevant fraction  
838 of ICU cases based on the represented proportions of  $geq$  and  $<$  population fractions within all  
839 susceptibles.

840 **Relevance of Basel-City in a European context - an overview.** Basel-City has to be seen in its  
841 larger context: Basel-City is the core city of the trinational Greater Basel area and functional  
842 urban area (FUA), according to the official European statistics system. Basel-City is also part  
843 of a European cross-border region in the European Employment Services Network (EURES)  
844 (FigureS1) that promotes labor mobility across state borders and it is a main center in the con-  
845 text of “European Regions”. “European regions” are “designer regions” or spaces of cooperation  
846 within well defined action perimeters. The role of such forms of regional governance is to fos-  
847 ter cross-border cooperation, regional competitiveness with collaborative development plans  
848 in interlinked, inter-locking metropolitan regions, which may be organized as “Eurodistricts”  
849 and are a mean in the EU-strategy to re-scale and decentralize development through regional  
850 institution building. Planning at the Eurodistrict level is regulated by state treaties and can act  
851 with a relatively high degree of autonomy from their national governments, mostly in the ar-  
852 eas of spatial planning, traffic development and other aspects where links in development are  
853 missing.

854 Moreover, Basel and the Greater Basel area are also part of the Upper Rhine Region Metropolitan  
855 Economy, which by regional gross domestic product (GDP) is the eighth largest metropolitan  
856 economy in the EU. In summary, the case study of Basel-City is representative or transferable  
857 to other similar urban contexts because in the European harmonised statistical classifications  
858 (Eurostat and OECD classifications) as a metropolitan area, a functional urban area, and a part  
859 of a European cross-border region, it is representative for other urban areas classified similarly.  
860 This makes information obtained from analyses of Basel-City comparable and transferable to

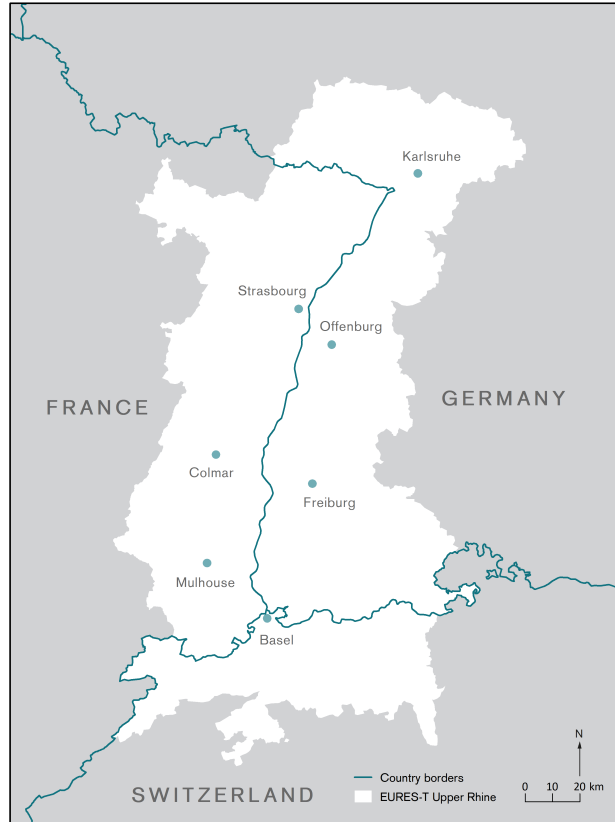

Figure S1: The EURES-T region Upper Rhine region for the purpose of promoting labor mobility across state borders. These comprise also the four “Eurodistricts” in the Upper Rhine “European region” for the purpose of decentralizing EU structural funds and promoting regional development. The Basel Trinational Eurodistrict is at the bottom.

861 other such urban areas. This is explained in more detail below.

862

863 *Basel Metropolitan area:* The Greater Basel area is a metropolitan area according the OECD/Eurostat

864 definition, stretching into three countries with a population of around 830,000 in the Trinational

865 Eurodistrict of Basel, an organization of municipalities and cities in the trinational surround-

866 ings of Basel and central cooperation body in the agglomeration of Basel <sup>57,58</sup>. Metropolitan re-

867 gions are NUTS 3 Eurostat statistical subdivisions according to the nomenclature des unités ter-

868 ritoriales statistiques - a classification of territorial units for statistical analyses. The NUTS clas-

869 sification provides for a harmonised hierarchy of regions and Eurostat lists 541 such metropoli-  
870 tan areas<sup>59</sup>.

871 Metropolitan areas are engines for growth and employment, the centers of competitiveness,  
872 and innovation, and contribute strongly to economic growth, social and political functions  
873 and are important for local, regional and international transport. Although only Basel-City,  
874 or rather, a small number of city quarters were examined here, Basel-City is a “hub”, i.e. the  
875 core of a larger metropolitan region with a commuter catchment area and on a scale that corre-  
876 sponds to the definitions of OECD and Eurostat (European Statistical Office) which also apply  
877 to Switzerland. As such, it is the contextualization of the city/urban quarter study within the  
878 larger urban/metropolitan/functional urban area, that make the study area comparable with  
879 other such metropolitan regions. Using Basel-City as a case study of an urban core or “core city”  
880 of its larger urban area / metropolitan area/ functional urban area makes the city, the study area  
881 and the results comparable or transferable to other urban areas/metropolitan areas/ functional  
882 urban areas and their core cities.

883

884 *Basel as a hub of a Functional Urban Area:* The Greater Basel area is also a functional  
885 urban area (FUA) in the official European statistics system. Functional urban areas consist of  
886 a densely inhabited city and a less densely populated commuting zone whose labor market is  
887 highly integrated with the city. FUAs extend beyond formal administrative boundaries. The  
888 OECD, in cooperation with the EU, has developed a harmonised definition of functional urban  
889 areas (FUAs). Being composed of a city (or core) and its commuting zone, FUAs encompass

890 the economic and functional extent of cities based on daily people's movements<sup>60</sup>. The defini-  
891 tion of FUA aims at providing a functional/economic definition of cities and their area of influ-  
892 ence, by maximising international comparability and overcoming the limitation of using purely  
893 administrative approaches. At the same time, the concept of FUA, unlike other approaches,  
894 ensures a minimum link to the government level of the city or metropolitan area. The new har-  
895 monized OECD definition of cities, urban areas, functional urban areas and commuting zones  
896 allows for the first time a comparison within the European urban hierarchy. It identified 828  
897 (greater) cities with an urban center of at least 50 000 inhabitants in the EU, and the "greater  
898 city level" greatly improved international comparability<sup>60</sup>.

899

900 *Basel-City as part of a European EURES-labor market and labor mobility region:* Basel-City  
901 is also part of a European cross-border region within the European commission's Strategy of  
902 Employment, Social Affairs and Inclusion European Employment Services-EURES cooperation  
903 network that promotes labor mobility in the EU and its partner countries in terms of assistance  
904 for recruitment and job placements, and providing information to cross order workers and em-  
905 ployers on issues such as social security, insurance and taxation<sup>61</sup>. EURES is based on technical  
906 standards and formats required for a uniform system to enable matching of job vacancies with  
907 job applications (Commission Implementing Decision (EU) 2017/1257 of 11 July 2017). EU in-  
908 ternal border regions cover 40% of EU territory and are home to almost 2 million cross-border  
909 commuters. In 2018, more than 1.5 million people in the EU lived in one country and worked  
910 in another. In the trinational Basel urban area 60,000 persons commute on a daily basis across

911 state borders, of which around 34,000 commute daily into Basel-City<sup>62</sup>. Just as mobility is an  
912 important factor in the economy, it may be a driving factor in the transmission of disease which  
913 is why the Basel study may be relevant for other cross-border regions in Europe.

914

915 *Basel-City as part of a European cross-border region:* The trilateral Basel metropolitan  
916 area with Basel-City as its center has been the first to organize itself in private initiative as a “Eu-  
917 ropean cross-border region” in 1960 (Regio Basiliensis e.V.) for the purpose of advancing com-  
918 mon interests and developments, enhancing cooperation between regions along state borders  
919 and between border regions throughout Europe. It has also served as a model for the institu-  
920 tionalised EU cross-border policy by means of INTERREG funding programs that aimed at pro-  
921 moting decentralized regional development through new forms of governance. Cross-border  
922 regions have flourished since the 1990 in particular because of their increasingly relevant role as  
923 implementation units for European regional policy in a context of multi-level governance<sup>63</sup>. To-  
924 day, there are some larger 100 cross-border regions as outlined in Figure S2. Within the nested  
925 hierarchy of European “designer regions” for the purpose of fostering regional development  
926 some contain the aforementioned Eurodistricts, which are a rather new model of regional gov-  
927 ernance for promoting economic development in several contiguous metropolitan areas.

928

929 *Perimeter of Unified Action of European regional governance:* The Greater Basel area is  
930 furthermore part of the “Trilateral Metropolitan Upper Rhine region” (TMUR). This refers to



931 an innovative governance model for the four sub-areas Alsace, France, Northwest Switzerland,  
932 Southern Palatinate and Baden, Germany which together form an internationally strong busi-  
933 ness and knowledge location. The TMUR region refers to a perimeter of unified planning policy  
934 measures within a closely interlinked cross-border territory on issues of common interest. As  
935 a rather new form of territorial governance the TMUR region acts as umbrella over the existing  
936 metropolitan regions and trilateral cooperations in the Upper Rhine and aims to strengthen  
937 their competitiveness within Europe and the world, and its public positions with respect to the  
938 political centers of Berlin, Paris, Bern, and Brussels. Collaborative efforts are focused on the  
939 areas of science, the economy, politics and civil society. By regional GDP and population size  
940 the TMUR can be seen as a major European metropolitan economy.

941 Metropolitan areas and metropolitan economies are engines and centers of growth and em-  
942 ployment, and their many universities and knowledge institutions are drivers of innovation  
943 and international competitiveness. Large urban agglomerations typically combine economic,  
944 social and political functions and form important hubs for regional and international connec-  
945 tion. Conceptually and methodically it is difficult to view this only in terms of administrative  
946 boundaries. The view on large metropolitan areas and regional governance models which en-  
947 compass multitudes of cities and towns is applied for international comparisons, and in today's  
948 global world the formation of larger metropolitan area governance forms which joins together  
949 urbanized areas even across administrative or state borders is the mechanism to achieve joint  
950 economic growth. The trilateral metropolitan region Upper Rhine, in turn, is a major urban  
951 economy within Europe, ranking eighth in terms of regional GDP behind metropolitan areas



952 outlined in Table S1.

Table S1: Selection of European metropolitan areas with GDP, population and GRP. Data obtained from <sup>65-68</sup>

|                                | GRP [bio. euros] | Population [mio.] | GRP per inhabitant |
|--------------------------------|------------------|-------------------|--------------------|
| Greater London area            | 946              | 19.53             | 48.443             |
| Paris (Ile de France)          | 709              | 12.15             | 58.358             |
| Rhine-Ruhr area                | 403              | 9.63              | 41.850             |
| Randstadt Netherlands          | 397              | 8.15              | 48.659             |
| Milan (Lombardy)               | 381              | 10.02             | 38.023             |
| Brussels-Antwerp               | 264              | 5.67              | 46.656             |
| Barcelona (Catalonia)          | 224              | 7.44              | 30.101             |
| <b>Trinational Upper</b>       |                  |                   |                    |
| <b>Rhine Metropolitan area</b> | <b>209</b>       | <b>5.9</b>        | <b>34.889</b>      |
| Frankfurt (Darmstadt)          | 200              | 3.95              | 50.666             |
| Copenhagen-Malmö               | 180              | 3.29              | 54.827             |
| Munich                         | 177              | 6.12              | 79.690             |
| Berlin                         | 169              | 3.65              | 40.104             |

## 953 Reasoning for the study design

954 Patterns of SARS-CoV-2 transmission have previously been discussed from different angles ei-  
955 ther via network and transmission modelling<sup>24</sup>, by statistical evaluation<sup>25</sup>, or by phylogenetic  
956 clustering based on genomic sequencing data<sup>26</sup>. Whereas modelling approaches can account  
957 for and simulate rich detail such as socioeconomic and demographic information, it is essen-  
958 tial to balance the trade-off between detail described and the number of data points available.  
959 Moreover, a more diverse socioeconomic and demographic population structure may make it  
960 easier to detect general trends. In order to address these needs, many modelling studies rely  
961 on publicly available case numbers without being able to relate the cases to specific socioe-  
962 conomic parameters and specific geographic locations, or have to perform analysis predomi-  
963 nantly for large metropolis. For such scenarios, it is inherently difficult to distinguish the spread  
964 of competing viral variants within the same population and to account for new introductions in  
965 a model - classical ODE or agent-based models are relying on the assumption of uninterrupted  
966 transmission chains, information that whole-genome sequencing can provide. Yet given the  
967 cost of such analyses, whole genome sequencing covering entire epidemic waves is often infea-  
968 sible. In this study we address the aforementioned limitations and choose a trade-off between  
969 the population detail studies in-light of limited case numbers for which we hold detailed in-  
970 formation, including whole genome sequencing: we perform an analysis for a medium-sized,  
971 European city to account for the under-representation of these urban areas in previous mod-  
972 elling approaches. The case data used in this analysis was available for 80% of all reported cases  
973 in Basel-City and includes detailed, highly sensitive information on the infected individuals

974 to enable tracing of transmission chains which are not publicly available. Sequencing was at-  
975 tempted for all samples and based on this data we restricted our analysis to inherently related  
976 cases of the B.1-C15324T variant. Although reducing the number of cases to <300, this implies  
977 that ODE based models are well suited to describe the dynamic development of these cases. We  
978 deliberately choose a continuum approach to incorporate socioeconomic, demographic and  
979 mobility information into this compartmental model since more complex network approaches  
980 would be infeasible for the final number of cases. This model enables us to evaluate general  
981 trends of transmission, such as effective reproductive numbers, and to use this information for  
982 vaccine scenario building.

983 In order to complement this more general analysis, we employ phylogenetic analysis to directly  
984 trace transmission clusters in detail. Phylogenetic analysis of positive cases provides rich infor-  
985 mation on relatedness of cases and hence supports modelling approaches by discerning intro-  
986 duction events and community spread. In this study we combine phylogenetic clustering with  
987 mathematical modelling of the SARS-CoV-2 transmission pattern. Our analysis is unique in the  
988 way that it is based on a large number of sequenced and phylogenetically related cases (411  
989 sequenced out 750 positives, 247 that belong to a single genomic variant). As such, we however  
990 hold rich information for a comparably small, yet densely sampled cohort of cases, and are able  
991 to provide a complete picture of SARS-CoV-2 transmission in a medium-sized city by choosing  
992 two complementary analysis tools.

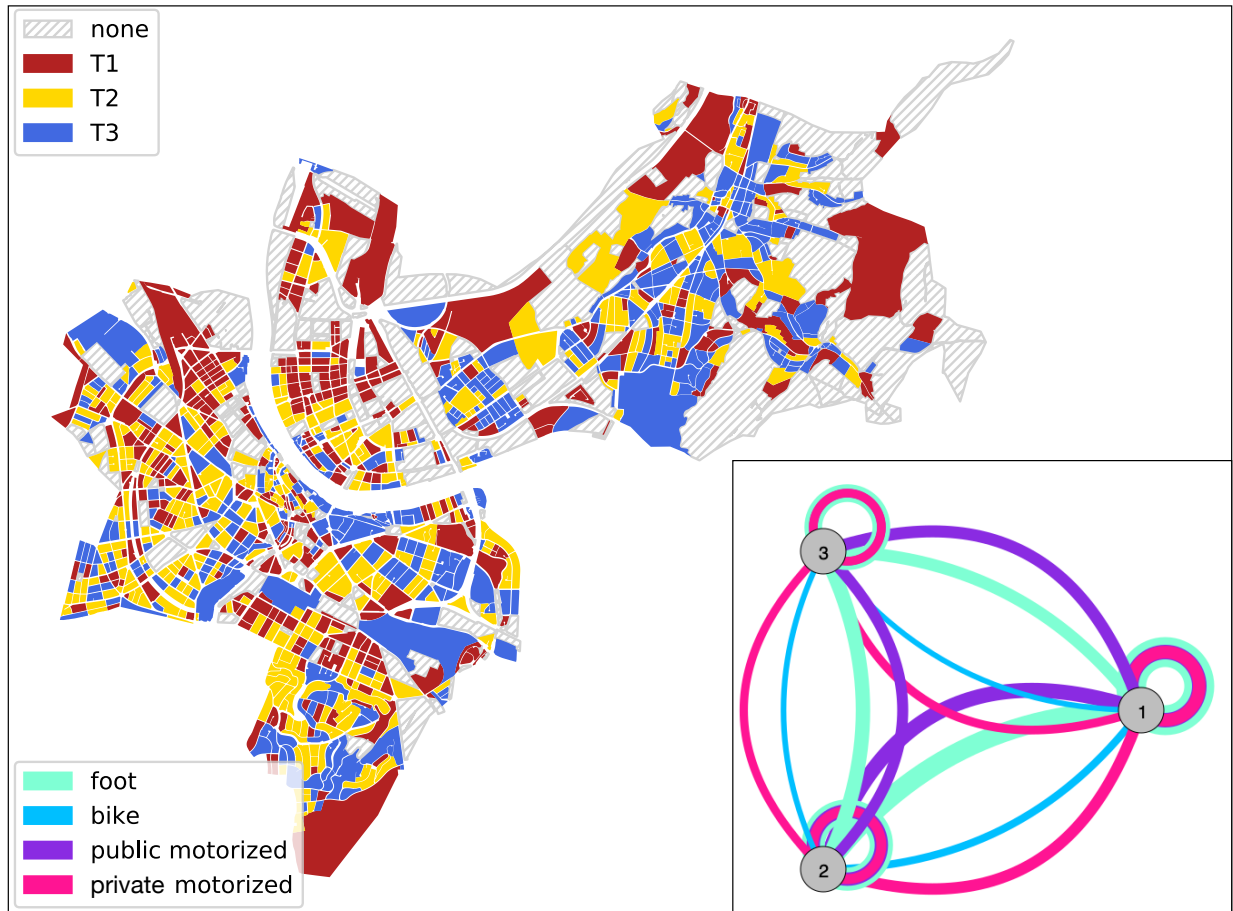

Figure S3: The Canton of Basel-City and its delineation with respect to statistical blocks colored according to the partition into tertiles T1, T2, and T3 of increasing fraction of residents aged older than 64 per block as provided by the canton's office for statistics. Inset: resulting mobility-graph, with nodes representing tertiles and edges representing effective connectedness through mobility by means of various modes of transport (thicker/thinner edges indicating weaker/stronger connectedness), as computed from the traffic-model provided by the traffic department of the Canton of Basel-City.

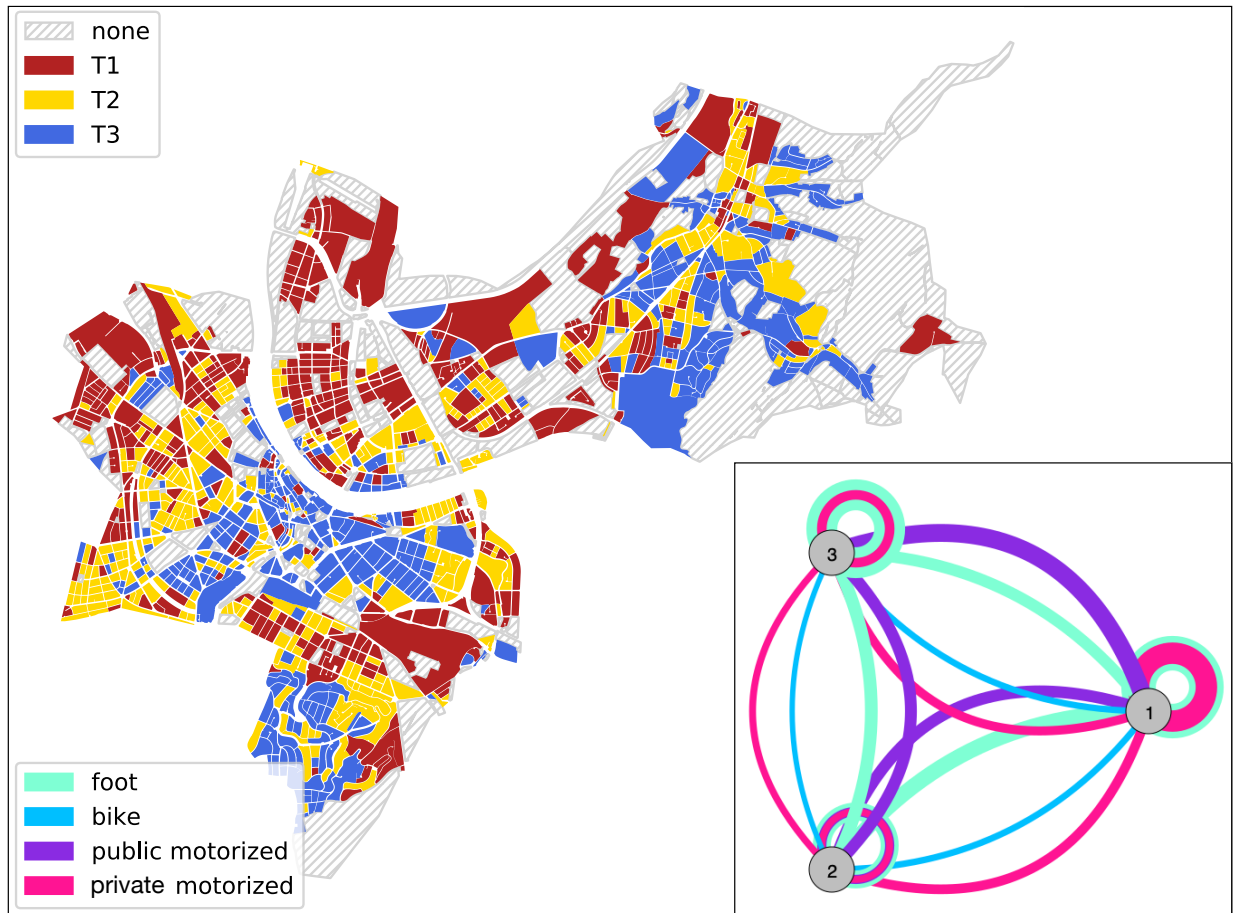

Figure S4: The Canton of Basel-City and its delineation with respect to statistical blocks colored according to the partition into tertiles T1, T2, and T3 of increasing living space per person as provided by the canton's office for statistics. Inset: resulting mobility-graph, with nodes representing tertiles and edges representing effective connectedness through mobility by means of various modes of transport (thicker/thinner edges indicating weaker/stronger connectedness), as computed from the traffic-model provided by the traffic department of the Canton of Basel-City.

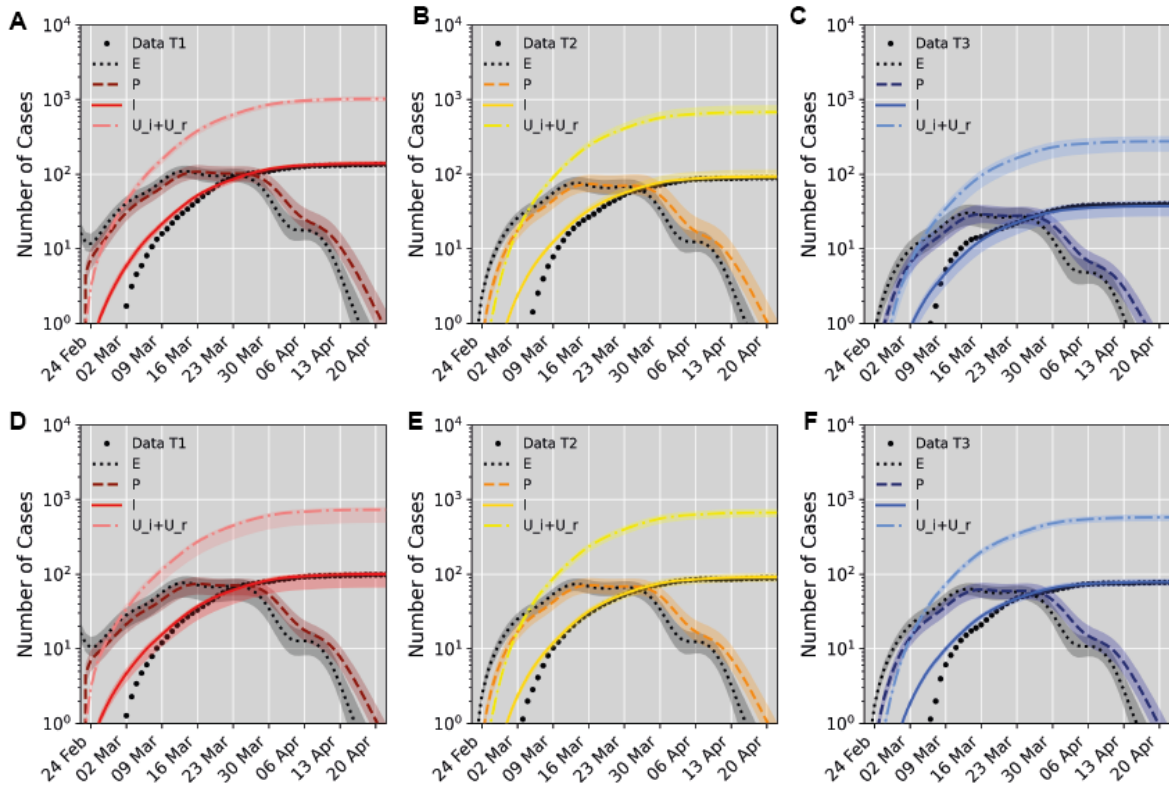

Figure S5: Model fit to data for partitions based on living space per person (A-C) and share of senior residents (D-F). Data points (dots) are shown together with model predictions for compartment  $I$  (solid lines, reported infected but isolated cases), the corresponding predictions for compartments  $E$  (exposed),  $P$  (presymptomatic) and  $U_i + U_r$  (the sum of the unreported infectious and recovered individuals) shown as lines with 95% confidence bounds (shaded bands) based on 500 markov chains. Results are shown individually for each tertile T1(A, D), T2 (B, E) and T3 (C, F).

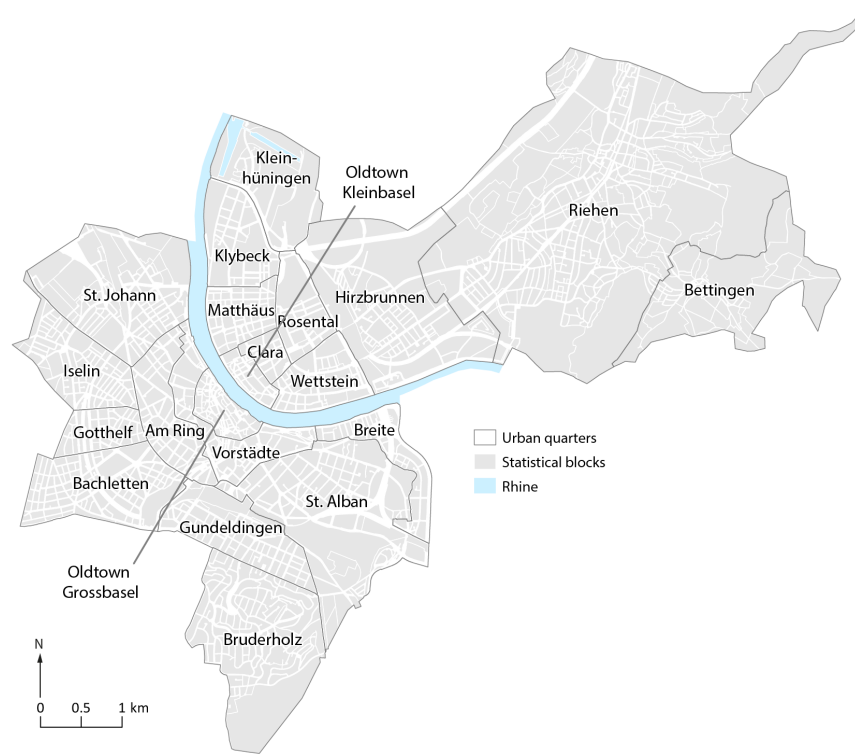

Urban quarters in Basel-City.

Figure S6: Urban quarters in Basel-City.

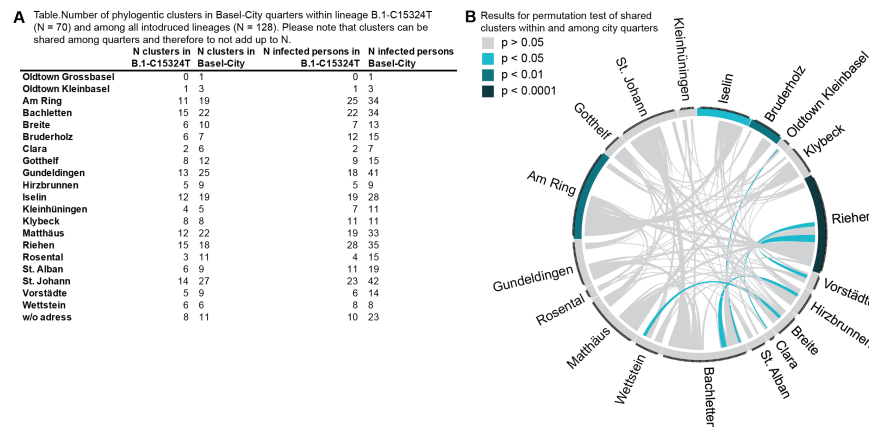

Figure S7: Phylogenetic clusters in quarters of Basel-City. A) Number of clusters within B.1-C15324T and within all viral variants in quarters of Basel-City. B) Visualisation of permutation analysis of shared phylogenetic clusters within and among urban quarters in Basel-City.



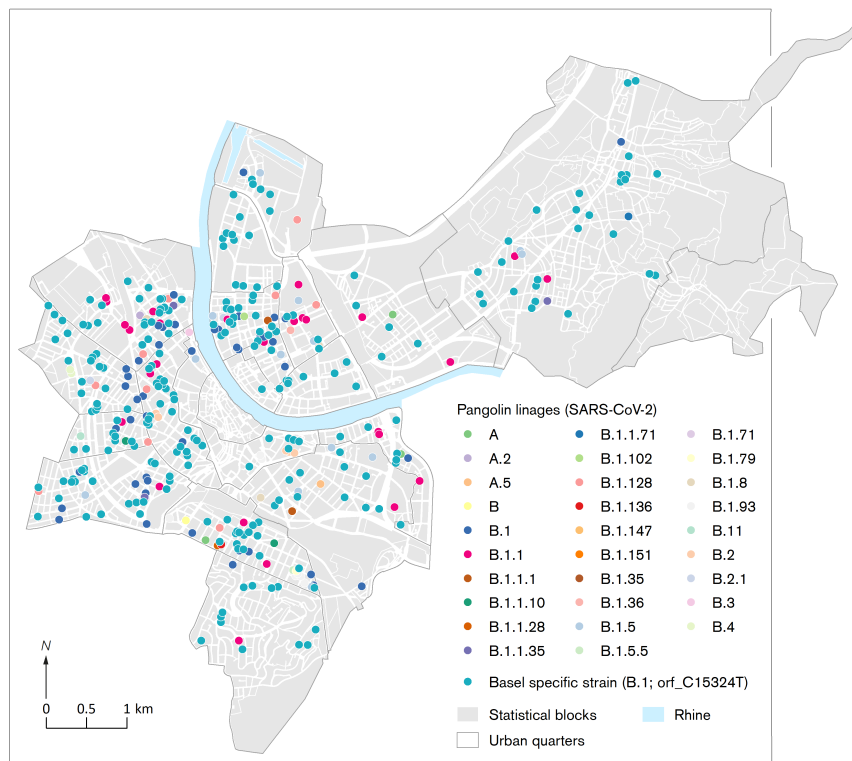

Figure S8: Lineage identity (pangolin) of PCR-confirmed COVID-19 cases from 26th of February until 22nd of April, 2020, in Basel-City with B.1-C15324T as dominant variant highlighted.

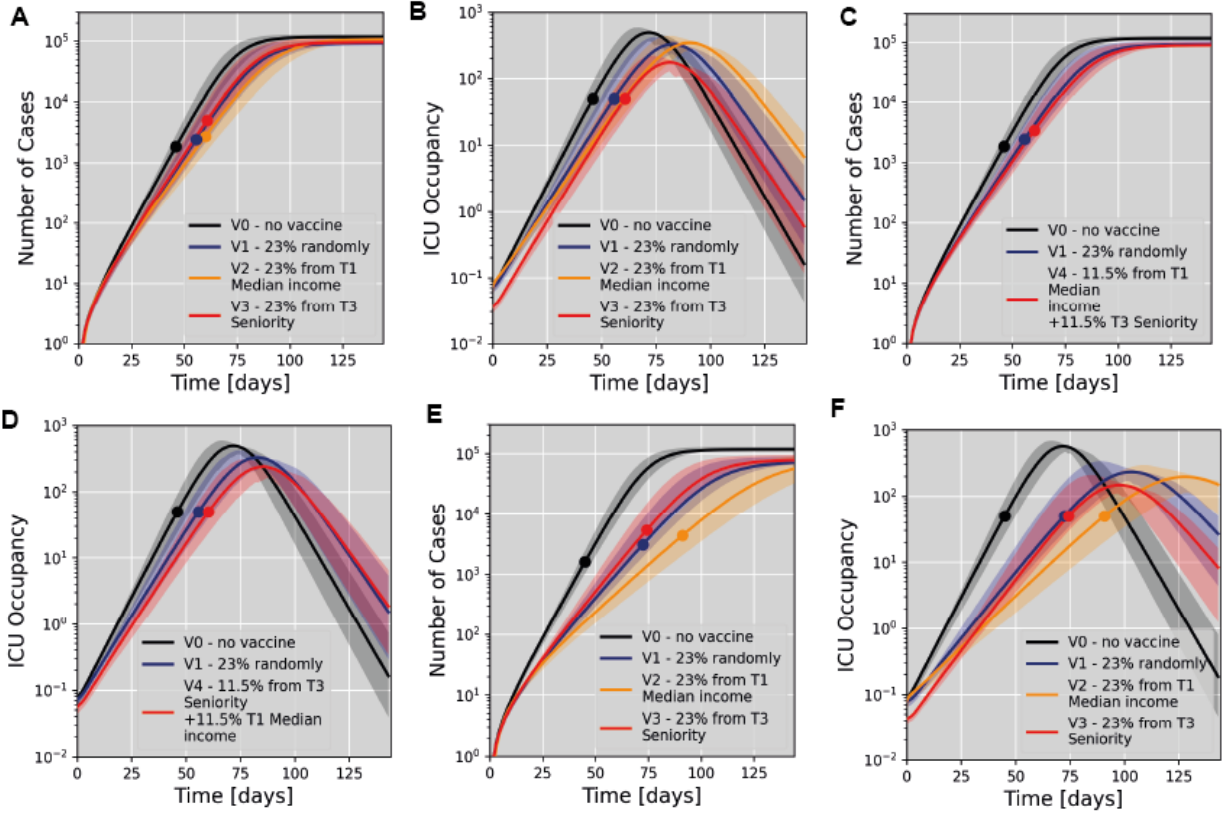

Figure S9: Modelling of vaccine scenarios assuming 60% (A-D) or 90% (E, F) vaccine efficacy to prevent SARS-CoV-2 transmission and 90% (A-D) or 70% (E, F) efficacy against severe COVID-19. We compare with scenarios V0 (no vaccination) and V1 (vaccination at random). Dots indicate the time of reaching a 50% ICU occupancy. A) Simulation of vaccination effects based on a partition according to median income. Scenario V2 models vaccination of 23% of all citizens selected from the tertile with the lowest median income (T1). Scenario V3 models vaccination of 23% of all citizens selected from the tertile with the highest share of senior residents (T3). B) Temporal evolution of ICU occupancy for the scenarios modelled in A). C) Simulation of a mixed vaccination strategy giving equal priority to senior citizens and mobile population groups. D) Temporal evolution of ICU occupancy for the scenarios modelled in C). E) Simulation of the same scenarios as in A) assuming 70% effective vaccination against severe COVID-19, and 90% vaccine efficacy to prevent SARS-CoV-2 transmission. F) Temporal evolution of ICU occupancy for the scenarios modelled in E).
